# Supplementary material for: Ethnobotanical characterization of medicinal plants used in Kisantu and Mbanza-Ngungu territories, Kongo-Central Province in DR Congo
Source: PubMed Central journal article supplement (PMC7824950; doi:10.1186/s13002-020-00428-7), 2021-01-23
Supplement: 13002_2020_428_MOESM1_ESM.pdf [file 13002_2020_428_MOESM1_ESM.pdf]

Synoptic table of medicinal plants and their use in Kisantu and Mbanza-Ngungu terroirs  
(in which a “Kisantu”, B “Mbanza-Ngungu urban area and, c “Mbanza-Ngungu rural area”).

| Species                                                                            | Local name              | Botanic family | Recording area | UV <sub>s</sub> | IAR  | Disease                                                                                                                                           | Organ               | Method of preparation | Method of administration | Morphology | Harvested area     |
|------------------------------------------------------------------------------------|-------------------------|----------------|----------------|-----------------|------|---------------------------------------------------------------------------------------------------------------------------------------------------|---------------------|-----------------------|--------------------------|------------|--------------------|
| <i>Abelmoschus esculentus</i> (L.) Moench                                          | Dongodongo              | Malvaceae      | a, b           | 0.01            | 1.00 | Diabetes                                                                                                                                          | Fruit/semence       | Powder, maceration    | Oral intake              | Herb       | Field, home garden |
| <i>Abrus precatorius</i> subsp. <i>africanus</i> Verdc.                            | Ngenguba                | Fabaceae       | a, c           | 0.01            | 0.00 | Cough<br>Madness                                                                                                                                  | Whole plant<br>Root | Decoction<br>Pounded  | Oral intake              | Liana      | Savanna            |
| <i>Acanthospermum hispidum</i> DC.                                                 | Madiata nzau            | Asteraceae     | a, b, c        | 0.02            | 0.00 | Pallor or dry skin, intermittent sever fevers, continuous diarrhea and loss of weigth of the baby due to infidelity by one of the parents (Sanga) | Leaf                | Powder                | Scarification            | Herb       | Ruderal            |
|                                                                                    |                         |                |                |                 |      | Tooth decay                                                                                                                                       |                     | Pounded               | Application on the organ |            |                    |
|                                                                                    |                         |                |                |                 |      | Appendicitis                                                                                                                                      |                     | Decoction             | Oral intake              |            |                    |
|                                                                                    |                         |                |                |                 |      | Zoster                                                                                                                                            |                     | Powder                | External application     |            |                    |
| <i>Adenia cissampeloides</i> (Planch. Ex Benth.) Harms                             | Mupembe                 | Passifloraceae | b              | 0.01            | 0.00 | Gastritis                                                                                                                                         | Root                | Decoction             | Oral intake              | Liana      | Forest recruit     |
| <i>Aframomum alboviolaceum</i> K.Schum.                                            | Kitundubila, Ntundulu   | Zingiberaceae  | a, b, c        | 0.04            | 0.00 | Microfilariate                                                                                                                                    | Root                | Pounded               | External application     |            |                    |
|                                                                                    |                         |                |                |                 |      | Hernia                                                                                                                                            | Stem                | Decoction             | Oral intake              |            |                    |
|                                                                                    |                         |                |                |                 |      | Paralysis                                                                                                                                         | Root, Stem          | Pounded               | Scarification            |            |                    |
|                                                                                    |                         |                |                |                 |      | Bronchitis                                                                                                                                        | Leaf                | Pounded               | Oral intake              |            |                    |
|                                                                                    |                         |                |                |                 |      | Rheumatism                                                                                                                                        | Root                | Decoction             | Friction                 | Herb       | Savanna            |
|                                                                                    |                         |                |                |                 |      | Interruption of the menstruation without being pregnant                                                                                           | Root                | Pounded               | Oral intake              |            |                    |
|                                                                                    |                         |                |                |                 |      | Back pain                                                                                                                                         | Fruit/semence       | Pounded               | Anal route               |            |                    |
|                                                                                    |                         |                |                |                 |      | Rheumatism                                                                                                                                        | Fruit/semence, leaf | Powder                | Scarification            |            |                    |
|                                                                                    |                         |                |                |                 |      | Hemorrhoids                                                                                                                                       | Fruit/semence       | Pounded, maceration   | Oral intake, anal route  |            |                    |
| <i>Aframomum melegueta</i> (Roscoe) K. Schum.                                      | Mondongo, Ndungu zi nzô | Zingiberaceae  | a, b, c        | 0.04            | 0.57 | Polio                                                                                                                                             | Fruit/semence, leaf | Decoction             | Oral intake              | Herb       | Field, home garden |
|                                                                                    |                         |                |                |                 |      | Hookworm                                                                                                                                          | Fruit/semence       | Powder                | Oral intake              |            |                    |
|                                                                                    |                         |                |                |                 |      | Epilepsy                                                                                                                                          | Fruit/semence       | Powder                | Oral intake              |            |                    |
|                                                                                    |                         |                |                |                 |      | Chest or intercostal pain                                                                                                                         | Fruit/semence       | Pounded               | Oral intake              |            |                    |
|                                                                                    |                         |                |                |                 |      | Female infertility                                                                                                                                | Whole plant         | Maceration            | Oral intake              |            |                    |
|                                                                                    |                         |                |                |                 |      | Tooth decay                                                                                                                                       |                     | Pounded               | Instillation             |            |                    |
| <i>Ageratum conyzoides</i> L.                                                      | Mpata kasakula          | Asteraceae     | b              | 0.02            | 0.00 | Female infertility                                                                                                                                | Leaf                | Maceration            | Seat bath                | Herb       | Ruderal            |
|                                                                                    |                         |                |                |                 |      | Back pain                                                                                                                                         |                     | Pounded               | Friction                 |            |                    |
|                                                                                    |                         |                |                |                 |      | Bronchitis                                                                                                                                        |                     | Trituration           | Oral intake              |            |                    |
| <i>Albizia adianthifolia</i> var. <i>intermedia</i> (De Wild. & T.Durand) Villiers | Mululu                  | Fabaceae       | a              | 0.01            | 0.00 | Hookworm                                                                                                                                          | Leaf                | Decoction             | Oral intake              | Tree       | Forest recruit     |
|                                                                                    |                         |                |                |                 |      | Tooth decay                                                                                                                                       |                     | Decoction             | Gargle                   |            |                    |
|                                                                                    |                         |                |                |                 |      | Back pain                                                                                                                                         |                     | Pounded               | Anal route               |            |                    |
|                                                                                    |                         |                |                |                 |      | Hemorrhoids                                                                                                                                       |                     | Decoction, maceration | Igestion, anal route     |            |                    |
| <i>Alchornea cordifolia</i> (Schumach.) Müll.Arg.                                  | Kibunsi                 | Euphorbiaceae  | a, b           | 0.03            | 0.20 | Repeated abortion or frequent delivery of stillbirths                                                                                             | Leaf                | Decoction             | Seat bath                | Shrub      | Humid forest       |
|                                                                                    |                         |                |                |                 |      | Epilepsy                                                                                                                                          |                     | Raw state             | Oral intake              |            |                    |

Synoptic table of medicinal plants and their use in Kisantu and Mbanza-Ngungu terroirs  
(in which a “Kisantu”, B “Mbanza-Ngungu urban area and, c “Mbanza-Ngungu rural area”).

| Species                                                             | Local name          | Botanic family          | Recording area | UV <sub>s</sub> | IAR  | Disease                      | Organ                            | Method of preparation         | Method of administration | Morphology | Harvested area     |
|---------------------------------------------------------------------|---------------------|-------------------------|----------------|-----------------|------|------------------------------|----------------------------------|-------------------------------|--------------------------|------------|--------------------|
| <i>Allium cepa</i> L.                                               | Bola                | <i>Amaryllidaceae</i>   | a, b, c        | 0.03            | 0.43 | Chest or intercostal pain    | Bulb                             | Pounded                       | Friction                 | Herb       | Field, home garden |
|                                                                     |                     |                         |                |                 |      | Hookworm                     |                                  | Infusion                      | Oral intake              |            |                    |
|                                                                     |                     |                         |                |                 |      | Gastritis                    |                                  | Maceration                    | Oral intake              |            |                    |
|                                                                     |                     |                         |                |                 |      | Madness                      |                                  | Decoction                     | Oral intake              |            |                    |
|                                                                     |                     |                         |                |                 |      | Gastritis                    |                                  | Decoction                     | Oral intake              |            |                    |
|                                                                     |                     |                         |                |                 |      | Hookworm                     |                                  | Infusion                      | Oral intake              |            |                    |
| <i>Allium fistulosum</i> L.                                         | Ndembu              | <i>Amaryllidaceae</i>   | a, c           | 0.01            | 0.00 | Epilepsy                     | Leaf, Fruit/semence              | Powder                        | Oral intake              | Herb       | Field, home garden |
|                                                                     |                     |                         |                |                 |      | Mastitis                     | Root                             | Pounded                       | Friction                 |            |                    |
|                                                                     |                     |                         |                |                 |      | Prostate                     | Whole plant                      | Maceration                    | Oral intake              |            |                    |
| <i>Allium sativum</i> L.                                            | Ayi                 | <i>Amaryllidaceae</i>   | a, b, c        | 0.03            | 0.50 | Amoebiasis                   | Bulb, Whole plant, Fruit/semence | Raw state, pounded, decoction | Oral intake, anal route  | Herb       | Field, home garden |
|                                                                     |                     |                         |                |                 |      | Premature ejaculation        | Bulb                             | Pounded                       | Oral intake              |            |                    |
|                                                                     |                     |                         |                |                 |      | Hookworm                     | Bulb                             | Decoction                     | Oral intake              |            |                    |
|                                                                     |                     |                         |                |                 |      | Gastritis                    | Bulb                             | Decoction, maceration         | Oral intake              |            |                    |
|                                                                     |                     |                         |                |                 |      | Hemorrhoids                  | Bulb                             | Maceration                    | Oral intake              |            |                    |
|                                                                     |                     |                         |                |                 |      | Hookworm                     | Bulb                             | Powder                        | Oral intake              |            |                    |
|                                                                     |                     |                         |                |                 |      | Chickenpox                   | Bulb                             | Pounded                       | Oral intake              |            |                    |
| Hookworm                                                            | Bulb                | Infusion                | Oral intake    |                 |      |                              |                                  |                               |                          |            |                    |
| <i>Aloe congolensis</i> De Wild. & T.Durand                         | Bà di nseki         | <i>Aloaceae</i>         | a, b, c        | 0.03            | 0.00 | Hernia                       | Leaf                             | Decoction                     | Oral intake              | Herb       | Savanna            |
|                                                                     |                     |                         |                |                 |      | Diabetes                     |                                  |                               |                          |            |                    |
|                                                                     |                     |                         |                |                 |      | Joint pain                   |                                  |                               |                          |            |                    |
|                                                                     |                     |                         |                |                 |      | Splenomegaly                 |                                  |                               |                          |            |                    |
|                                                                     |                     |                         |                |                 |      | Mastitis                     |                                  |                               |                          |            |                    |
| <i>Alstonia congolensis</i> Engl.                                   | Nsanga              | <i>Apocynaceae</i>      | b              | 0.01            | 0.00 | Zoster                       | Stem                             | Decoction                     | Oral intake              | Tree       | Swamp forest       |
| <i>Amaranthus blitum</i> L.                                         | Nkuka bangulu       | <i>Amaranthaceae</i>    | b              | 0.01            | 0.00 | Alcoholism and smoking       | Leaf                             | Powder                        | Oral intake              | Herb       | Ruderal            |
| <i>Amphiblemma ciliatum</i> Cogn.                                   | Nsa masa            | <i>Melastomata-ceae</i> | a, b           | 0.01            | 0.00 | Rheumatism                   | Leaf                             | Decoction                     | Oral intake              | Shrub      | Ruderal            |
|                                                                     |                     |                         |                |                 |      | Epilepsy                     |                                  | Maceration                    | Instillation             |            |                    |
| <i>Ananas comosus</i> (L.) Merr.                                    | Nanasi              | <i>Bromeliaceae</i>     | a, b, c        | 0.03            | 0.00 | Sexual weakness or impotence | Fruit/semence                    | Pounded                       | Oral intake              | Herb       | Field, home garden |
|                                                                     |                     |                         |                |                 |      | Hernia                       | Fruit/semence                    | Decoction                     | Oral intake              |            |                    |
|                                                                     |                     |                         |                |                 |      | Sciatic neuralgia            | Fruit/semence                    | Infusion                      | Oral intake              |            |                    |
|                                                                     |                     |                         |                |                 |      | Gastritis                    | Fruit/semence                    | Decoction, maceration         | Oral intake              |            |                    |
| <i>Anchomanes difformis</i> Engl.                                   | Kikwa ki ba nkita   | <i>Araceae</i>          | b              | 0.01            | 0.00 | Yellow fever                 | Leaf                             | Pounded                       | Anal route               | Herb       | Humid forest       |
|                                                                     |                     |                         |                |                 |      | Hepatic sirosis              | Tuber                            | Decoction                     | Oral intake              |            |                    |
| <i>Anisophyllea quangensis</i> Engl. ex Henriq.                     | Mfungu- Mbila esobe | <i>Anisophilla-ceae</i> | a              | 0.01            | 0.00 | Asthma                       | Leaf                             | Powder                        | Oral intake              | Shrub      | Savanna            |
| <i>Annona muricata</i> L.                                           | Mbundu ngombi       | <i>Annonaceae</i>       | a, b           | 0.02            | 0.00 | Pertussis                    | Leaf                             | Decoction                     | Oral intake              | Shrub      | Field, home garden |
|                                                                     |                     |                         |                |                 |      | Itchy skin rash              |                                  | Pounded                       | External application     |            |                    |
|                                                                     |                     |                         |                |                 |      | Cough                        |                                  | Decoction                     | Oral intake              |            |                    |
| <i>Annona senegalensis</i> Pers. Subsp. <i>Oulotricha</i> Le Thomas | Lomboloka           | <i>Annonaceae</i>       | a, b           | 0.04            | 0.00 | Tripanosomiasis              | Root                             | Decoction                     | Oral intake              | Shrub      | Savanna            |
|                                                                     |                     |                         |                |                 |      | Hemorrhoids                  | Root                             |                               | Oral intake              |            |                    |
|                                                                     |                     |                         |                |                 |      | Splenomegaly                 | Root                             |                               | Anal route               |            |                    |
|                                                                     |                     |                         |                |                 |      | Testicular disappearance     | Root                             |                               | Oral intake              |            |                    |
|                                                                     |                     |                         |                |                 |      | Hernia                       | Root                             |                               | Oral intake              |            |                    |
|                                                                     |                     |                         |                |                 |      | Diabetes                     | Root                             |                               | Oral intake              |            |                    |
|                                                                     |                     |                         |                |                 |      | Anemia                       | Leaf                             |                               | Oral intake              |            |                    |

Synoptic table of medicinal plants and their use in Kisantu and Mbanza-Ngungu terroirs  
(in which a “Kisantu”, B “Mbanza-Ngungu urban area and, c “Mbanza-Ngungu rural area”).

| Species                                     | Local name                   | Botanic family        | Recording area | UV <sub>s</sub> | IAR  | Disease                                                                                                                                                                                                                                                                                | Organ                                                                                                        | Method of preparation                                                                                                                                                                                                 | Method of administration                                                                                                                                                                                                      | Morphology | Harvested area     |
|---------------------------------------------|------------------------------|-----------------------|----------------|-----------------|------|----------------------------------------------------------------------------------------------------------------------------------------------------------------------------------------------------------------------------------------------------------------------------------------|--------------------------------------------------------------------------------------------------------------|-----------------------------------------------------------------------------------------------------------------------------------------------------------------------------------------------------------------------|-------------------------------------------------------------------------------------------------------------------------------------------------------------------------------------------------------------------------------|------------|--------------------|
| <i>Anthocleista schweinfurthii</i> Gilg     | Mpuku mpuku                  | <i>Gentianaceae</i>   | b              | 0.01            | 0.00 | Diarrhea<br>Female infertility                                                                                                                                                                                                                                                         | Root                                                                                                         | Decoction<br>Maceration                                                                                                                                                                                               | Anal route                                                                                                                                                                                                                    | Tree       | Forest fallow      |
| <i>Undefined</i>                            | Anti-poison                  | <i>Undefined</i>      | b              | 0.01            | 0.00 | Poisoning                                                                                                                                                                                                                                                                              | Bark                                                                                                         | Raw state                                                                                                                                                                                                             | Oral intake                                                                                                                                                                                                                   | Liana      | Forest recruit     |
| <i>Antidesma rufescens</i> Tul.             | Fuitidi                      | <i>Euphorbiaceae</i>  | b              | 0.01            | 0.00 | Infections due to STI (sexually transmitted infections)                                                                                                                                                                                                                                | Bark                                                                                                         | Decoction                                                                                                                                                                                                             | Oral intake                                                                                                                                                                                                                   | Shrub      | Savanna            |
| <i>Arachis hypogaea</i> L.                  | Nguba                        | <i>Fabaceae</i>       | a, c           | 0.01            | 0.00 | Madness<br>Diarrhea                                                                                                                                                                                                                                                                    | Fruit/semence                                                                                                | Decoction<br>Raw state                                                                                                                                                                                                | Oral intake                                                                                                                                                                                                                   | Herb       | Field, home garden |
| <i>Artemisia annua</i> L.                   | Artemisia                    | <i>Asteraceae</i>     | a              | 0.01            | 0.00 | Malaria                                                                                                                                                                                                                                                                                | Leaf                                                                                                         | Decoction<br>Powder                                                                                                                                                                                                   | Oral intake                                                                                                                                                                                                                   | Herb       | Field, home garden |
| <i>Bambusa vulgaris</i> Schrad. ex JCWendl. | Tùutu                        | <i>Poaceae</i>        | b              | 0.01            | 0.00 | Tension                                                                                                                                                                                                                                                                                | Young shoot                                                                                                  | Decoction                                                                                                                                                                                                             | Oral intake                                                                                                                                                                                                                   | Shrub      | Forest recruit     |
| <i>Bidens pilosa</i> L.                     | Nsolokoto                    | <i>Asteraceae</i>     | a, c           | 0.02            | 0.00 | Ache<br>Sciatic neuralgia<br>Hemorrhoids                                                                                                                                                                                                                                               | Leaf<br>Leaf<br>Fruit/semence                                                                                | Trituration<br>Decoction<br>Crushed                                                                                                                                                                                   | Friction<br>Oral intake<br>Oral intake                                                                                                                                                                                        | Herb       | Ruderal            |
| <i>Boerhavia diffusa</i> L.                 | Dibatabata, linioko ya tembe | <i>Nyctaginaceae</i>  | a, b           | 0.02            | 0.00 | Splenomegaly<br>Furuncle<br>Bronchitis                                                                                                                                                                                                                                                 | Whole plant<br>Leaf<br>Leaf                                                                                  | Pounded<br>Buckling<br>Pounded                                                                                                                                                                                        | Anal route<br>External application<br>Oral intake                                                                                                                                                                             | Herb       | Ruderal            |
| <i>Brassica oleracea</i> L.                 | Nkoofi                       | <i>Brassicaceae</i>   | a              | 0.01            | 0.00 | Splenomegaly<br>Prostate                                                                                                                                                                                                                                                               | Leaf<br>Leaf                                                                                                 | Pounded<br>Decoction                                                                                                                                                                                                  | Oral intake                                                                                                                                                                                                                   | Herb       | Field, home garden |
| <i>Bridelia ferruginea</i> Benth.           | Kimwindu                     | <i>Phyllanthaceae</i> | a, b, c        | 0.04            | 0.14 | Gastritis<br>Tuberculosis<br>Diabetes<br>Laryngitis<br>Rheumatism<br>Laryngitis<br>Interruption of the menstruation without being pregnant<br>Hemorrhoids                                                                                                                              | Root<br>Root<br>Root<br>Root<br>Root<br>Root<br>Root<br>Root                                                 | Decoction<br>Decoction<br>Decoction<br>Decoction<br>Decoction<br>Decoction<br>Pounded                                                                                                                                 | Oral intake                                                                                                                                                                                                                   | Shrub      | Savanna            |
| <i>Brillantaisia patula</i> T. Anderson     | Lemba-lemba                  | <i>Acanthaceae</i>    | a, b, c        | 0.05            | 0.31 | Buruli ulcer<br>Heaviness in the head, seems to split in the baby<br>Headache<br>Madness<br>Joint pain<br>Chronic scabies with itching and stink<br>Acute nervousness<br>Itchy skin rash<br>Headache<br>Itchy skin rash<br>Gastritis<br>Alcoholism and smoking<br>Gastritis<br>Madness | Leaf<br>Leaf<br>Leaf<br>Leaf<br>Leaf<br>Leaf<br>Leaf<br>Leaf<br>Leaf<br>Leaf<br>Leaf<br>Leaf<br>Leaf<br>Leaf | Decoction<br>Pounded<br>Maceration<br>Decoction<br>Pounded<br>Decoction<br>Decoction<br>Pounded<br>Decoction, maceration<br>Powder<br>Pounded<br>Maceration<br>Powder<br>Pounded<br>Decoction<br>Decoction<br>Pounded | External application<br>Oral intake<br>Oral intake<br>Oral intake<br>Oral intake<br>External application<br>Oral intake<br>Oral intake<br>Friction<br>Oral intake<br>Oral intake<br>Oral intake<br>Oral intake<br>Oral intake | Shrub      | Field, home garden |

Synoptic table of medicinal plants and their use in Kisantu and Mbanza-Ngungu terroirs  
(in which a “Kisantu”, B “Mbanza-Ngungu urban area and, c “Mbanza-Ngungu rural area”).

| Species                                         | Local name       | Botanic family       | Recording area | UV <sub>s</sub> | IAR  | Disease                                            | Organ               | Method of preparation         | Method of administration | Morphology | Harvested area     |
|-------------------------------------------------|------------------|----------------------|----------------|-----------------|------|----------------------------------------------------|---------------------|-------------------------------|--------------------------|------------|--------------------|
| <i>Bryophyllum pinnatum</i> Kurz.               | Liyuki-yuki      | <i>Crassulaceae</i>  | a, c           | 0.01            | 0.00 | Cough                                              | Leaf                | Pounded                       | Oral intake              | Shrub      | Ruderal            |
|                                                 |                  |                      |                |                 |      | Otitis                                             |                     | Trituration                   | Instillation             |            |                    |
|                                                 |                  |                      |                |                 |      | Migraine                                           | Leaf                | Pounded                       | Instillation             |            |                    |
| <i>Cajanus cajan</i> (L.) Millsp.               | Wañandu          | <i>Fabaceae</i>      | a, b           | 0.03            | 0.00 | Chronic scabies with itching and stink             | Fruit/semence       | Powder                        | Friction                 | Shrub      | Field, home garden |
|                                                 |                  |                      |                |                 |      | Gonorrhea                                          |                     |                               |                          |            |                    |
|                                                 |                  |                      |                |                 |      | Skin rash                                          | Fruit/semence       | Maceration                    | Oral intake              |            |                    |
|                                                 |                  |                      |                |                 |      | Polio                                              | Leaf                | Decoction                     | Oral intake              |            |                    |
| <i>Caloncoba welwitschii</i> Gilg               | Kisani           | <i>Salicaceae</i>    | a              | 0.01            | 0.00 | Chest or intercostal pain                          | Leaf                | Pounded                       | Friction                 | Shrub      | Forest recruit     |
| <i>Canarium schweinfurthii</i> Engl.            | Kibidi           | <i>Burseraceae</i>   | b              | 0.01            | 0.00 | Migraine                                           | Bark                | Maceration                    | Enema                    | Tree       | Forest gallery     |
| <i>Canna indica</i> L.                          | Makombu kombu    | <i>Cannaceae</i>     | a              | 0.01            | 0.00 | Lack of uvula causing the baby to cry continuously | Leaf                | Maceration                    | Oral intake              | Herb       | Ruderal            |
|                                                 |                  |                      |                |                 |      | Rheumatism                                         |                     |                               |                          |            |                    |
|                                                 |                  |                      |                |                 |      | Sexual weakness or impotence                       | Fruit/semence       | Powder                        | Oral intake              |            |                    |
|                                                 |                  |                      |                |                 |      | Hemorrhoids                                        | Fruit/semence, leaf | Pounded                       | Oral intake, anal route  |            |                    |
| <i>Capsicum frutescens</i> L.                   | Ndungu zi ntendi | <i>Solanaceae</i>    | a, b, c        | 0.05            | 0.27 | Hernia                                             | Root                | Decoction                     | Oral intake              | Herb       | Field, home garden |
|                                                 |                  |                      |                |                 |      | Chronic scabies with itching and stink             |                     |                               |                          |            |                    |
|                                                 |                  |                      |                |                 |      | Migraine                                           | Leaf                | Trituration                   | External application     |            |                    |
|                                                 |                  |                      |                |                 |      | Whitlow                                            | Fruit/semence       | Pounded                       | External application     |            |                    |
|                                                 |                  |                      |                |                 |      | Mastitis                                           | Leaf                | Pounded                       | Friction                 |            |                    |
|                                                 |                  |                      |                |                 |      | Female infertility                                 | Fruit/semence       | Maceration                    | Oral intake              |            |                    |
|                                                 |                  |                      |                |                 |      | Amoebiasis                                         | Fruit/semence       | Pounded                       | Anal route               |            |                    |
|                                                 |                  |                      |                |                 |      | Tooth decay                                        | Fruit/semence       | Raw state                     | Fumigation               |            |                    |
|                                                 |                  |                      |                |                 |      | Sciatic neuralgia                                  | Root                | Decoction                     | Friction                 |            |                    |
|                                                 |                  |                      |                |                 |      | Epilepsy                                           | Leaf                | Powder                        | Oral intake              |            |                    |
| <i>Carica papaya</i> L.                         | Dipapayi         | <i>Caricaceae</i>    | a, b, c        | 0.03            | 0.00 | Mastitis                                           | Root                | Pounded                       | Friction                 | Tree       | Field, home garden |
|                                                 |                  |                      |                |                 |      | Malaria                                            |                     |                               |                          |            |                    |
|                                                 |                  |                      |                |                 |      | Amoebiasis                                         | Leaf, whole plant   | Decoction, raw state, pounded | Oral intake              |            |                    |
|                                                 |                  |                      |                |                 |      | Breastfeeding                                      |                     |                               |                          |            |                    |
|                                                 |                  |                      |                |                 |      | Hemorrhoids                                        | Whole plant         | Maceration                    | Oral intake, anal route  |            |                    |
|                                                 |                  |                      |                |                 |      | Hookworm                                           | Whole plant         | Infusion                      | Oral intake              |            |                    |
| <i>Chenopodium ambrosioides</i> L.              | Nkasa kindongo   | <i>Chenoponiidae</i> | a, c           | 0.02            | 0.00 | Tooth decay                                        | Whole plant         | Decoction                     | Oral intake              | Herb       | Ruderal            |
|                                                 |                  |                      |                |                 |      | Cough                                              |                     |                               |                          |            |                    |
|                                                 |                  |                      |                |                 |      | Amoebiasis                                         | Leaf, stem          | Decoction                     | Oral intake              |            |                    |
|                                                 |                  |                      |                |                 |      | Rheumatism                                         | Whole plant         | Decoction                     | Friction                 |            |                    |
| <i>Chromolaena odorata</i> (L.) RMKing & H.Rob. | Kolera           | <i>Asteraceae</i>    | a              | 0.01            | 0.00 | Cough                                              | Leaf                | Decoction                     | Oral intake              | Herb       | Savanna            |

Synoptic table of medicinal plants and their use in Kisantu and Mbanza-Ngungu terroirs  
(in which a “Kisantu”, B “Mbanza-Ngungu urban area and, c “Mbanza-Ngungu rural area”).

| Species                                            | Local name               | Botanic family | Recording area | UV <sub>s</sub> | IAR  | Disease                                                                                                                                           | Organ         | Method of preparation | Method of administration | Morphology | Harvested area     |
|----------------------------------------------------|--------------------------|----------------|----------------|-----------------|------|---------------------------------------------------------------------------------------------------------------------------------------------------|---------------|-----------------------|--------------------------|------------|--------------------|
| <i>Cinnamomum verum</i> J.Presl                    | Arbre du bonheur         | Lauraceae      | a              | 0.01            | 0.00 | Premature ejaculation                                                                                                                             | Bark          | Decoction             | Oral intake              | Tree       | Humid forest       |
| <i>Cissus aralioides</i> (Welw. Ex Baker) Planch.  | Mbua mpimbidi, kindamina | Vitaceae       | b, c           | 0.01            | 0.00 | Elephantiasis and yellowing of the hair<br>Malnutrition and kwashiorkor                                                                           | Leaf          | Decoction             | Oral intake              | Liana      | Humid forest       |
| <i>Cissus rubiginosa</i> (Welw. Ex Baker) Planch.  | Mumpongo mpongo          | Vitaceae       | a              | 0.01            | 0.00 | Back pain<br>Amoebiasis                                                                                                                           | Leaf          | Decoction<br>Infusion | Oral intake              | Liana      | Forest fallow      |
| <i>Citrullus lanatus</i> (Thunb.) Matsum. Et Nakai | Mbika ntetu              | Cucurbitaceae  | b              | 0.01            | 0.00 | Epilepsy                                                                                                                                          | Leaf          | Raw state             | Oral intake              | Liana      | Field, home garden |
| <i>Citrus limon</i> (L.) Osbeck                    | Lala di ngani            | Rutaceae       | a, b, c        | 0.03            | 0.17 | Pertussis                                                                                                                                         | Leaf          | Decoction             | Oral intake              | Shrub      | Field, home garden |
|                                                    |                          |                |                |                 |      | Buruli ulcer                                                                                                                                      | Fruit/semence | Raw state             | Enema                    |            |                    |
|                                                    |                          |                |                |                 |      | Sciatic neuralgia                                                                                                                                 | Fruit/semence | Decoction             | Friction                 |            |                    |
|                                                    |                          |                |                |                 |      | Anemia                                                                                                                                            | Fruit/semence | Decoction             | Oral intake              |            |                    |
|                                                    |                          |                |                |                 |      | Gastritis                                                                                                                                         | Fruit/semence | Decoction, infusion   | Oral intake              |            |                    |
| Mastitis                                           | Fruit/semence            | Pounded        | Friction       |                 |      |                                                                                                                                                   |               |                       |                          |            |                    |
| <i>Citrus reticulata</i> Blanco                    | Mandeleni                | Rutaceae       | b              | 0.01            | 0.00 | Female infertility                                                                                                                                | Root          | Maceration            | Seat bath                | Shrub      | Field, home garden |
| <i>Clematis hirsuta</i> Guill. & Perr.             | Nkonka-ntu               | Ranunculaceae  | a              | 0.02            | 0.00 | Headache                                                                                                                                          | Leaf          | Decoction             | Oral intake              | Liana      | Forest recruit     |
|                                                    |                          |                |                |                 |      | Migraine                                                                                                                                          | Leaf          | Pounded               | Friction                 |            |                    |
|                                                    |                          |                |                |                 |      | Splenomegaly                                                                                                                                      | Root          | Maceration            | Oral intake              |            |                    |
|                                                    |                          |                |                |                 |      | Prostate                                                                                                                                          | Leaf          | Decoction             | Oral intake              |            |                    |
| Asthma                                             | Leaf                     | Powder         | Oral intake    |                 |      |                                                                                                                                                   |               |                       |                          |            |                    |
| <i>Clerodendrum formicarum</i> Gürke               | Makuku ma tatu           | Lamiaceae      | a, b, c        | 0.03            | 0.20 | Pallor or dry skin, intermittent sever fevers, continuous diarrhea and loss of weigth of the baby due to infidelity by one of the parents (Sanga) | Leaf          | Powder                | Scarification            | Herb       | Ruderal            |
|                                                    |                          |                |                |                 |      | Headache                                                                                                                                          | Leaf          | Crushed               | Friction                 |            |                    |
|                                                    |                          |                |                |                 |      | Itchy skin rash                                                                                                                                   | Leaf          | Maceration, pounded   | Oral intake              |            |                    |
|                                                    |                          |                |                |                 |      | Epilepsy                                                                                                                                          | Leaf          | Raw state             | Oral intake              |            |                    |
| <i>Clerodendrum splendens</i> G.Don                | Kindangolo               | Lamiaceae      | a              | 0.01            | 0.00 | Polio                                                                                                                                             | Leaf          | Powder                | Scarification            | Liana      | Forest recruit     |
| <i>Cocos nucifera</i> L.                           | Nkandi mputu, Kokoti     | Areaceae       | a              | 0.01            | 0.00 | Sexual weakness or impotence                                                                                                                      | Fruit/semence | Pounded               | Oral intake              | Tree       | Field, home garden |
| <i>Coffea</i> sp.                                  | Kafi                     | Rubiaceae      | a, b           | 0.01            | 0.50 | Sexual weakness or impotence<br>Hernia                                                                                                            | Fruit/semence | Powder                | Oral intake              | Shrub      | Field, home garden |
| <i>Cogniauxia podolaena</i> Baill.                 | Kisakamba                | Cucurbitaceae  | a              | 0.01            | 0.00 | Frigidity and narrowing of the vagina                                                                                                             | Root          | Decoction             | Oral intake              | Liana      | Ruderal            |
| <i>Cola acuminata</i> (P.Beauv.) Schott & Endl.    | Kasu                     | Malvaceae      | a, b, c        | 0.04            | 0.14 | Heaviness in the head, seems to split in the baby                                                                                                 | Fruit/semence | Maceration            | Oral intake              | Shrub      | Field, home garden |
|                                                    |                          |                |                |                 |      | Hemorrhoids                                                                                                                                       |               | Maceration            |                          |            |                    |
|                                                    |                          |                |                |                 |      | Premature ejaculation                                                                                                                             |               | Infusion              |                          |            |                    |
|                                                    |                          |                |                |                 |      | Epilepsy                                                                                                                                          |               | Powder                |                          |            |                    |

Synoptic table of medicinal plants and their use in Kisantu and Mbanza-Ngungu terroirs  
(in which a “Kisantu”, B “Mbanza-Ngungu urban area and, c “Mbanza-Ngungu rural area”).

| Species                                                             | Local name    | Botanic family | Recording area | UV <sub>s</sub> | IAR  | Disease                                                 | Organ        | Method of preparation | Method of administration | Morphology | Harvested area     |
|---------------------------------------------------------------------|---------------|----------------|----------------|-----------------|------|---------------------------------------------------------|--------------|-----------------------|--------------------------|------------|--------------------|
|                                                                     |               |                |                |                 |      | Skin rash                                               |              | Maceration            |                          |            |                    |
|                                                                     |               |                |                |                 |      | Sexual weakness or impotence                            |              | Infusion              |                          |            |                    |
|                                                                     |               |                |                |                 |      | Chest or intercostal pain                               |              | Pounded               |                          |            |                    |
| <i>Combretum racemosum</i><br>P. Beauv.                             | Nsumbila      | Combretaceae   | b              | 0.01            | 0.00 | Healing                                                 | Leaf         | Trituration           | External application     | Liana      | Forest gallery     |
|                                                                     |               |                |                |                 |      | Pneumonia                                               |              | Pounded               | Friction                 |            |                    |
| <i>Commelina africana</i> L.                                        | Nlakisi       | Commelinaceae  | a, b, c        | 0.01            | 0.50 | Itchy skin rash                                         | Leaf         | Maceration, pounded   | Oral intake              | Herb       | Ruderal            |
|                                                                     |               |                |                |                 |      | Migraine                                                |              | Maceration            | Enema                    |            |                    |
| <i>Corymbia citriodora</i><br>(Hook.) K. D. Hill & L. A. S. Johnson | Bikalipitusu  | Myrtaceae      | b              | 0.01            | 1.00 | Cough                                                   | Leaf         | Decoction             | Oral intake              | Tree       | Forest gallery     |
| <i>Costus lucanusianus</i><br>J. Braun et K. Schum.                 | Maboso boso   | Costaceae      | a, b, c        | 0.02            | 0.00 | Asthma                                                  | Whole plant  | Pounded               |                          |            |                    |
|                                                                     |               |                |                |                 |      | Hiccup                                                  | Leaf         | Pounded               |                          |            |                    |
|                                                                     |               |                |                |                 |      | Chickenpox                                              | Whole plant  | Pounded               | Oral intake              | Herb       | Humid forest       |
|                                                                     |               |                |                |                 |      | Madness                                                 | Root         | Decoction             |                          |            |                    |
|                                                                     |               |                |                |                 |      | Asthma                                                  | Whole plant  | Pounded               | Oral intake              |            |                    |
|                                                                     |               |                |                |                 |      | Enuresis                                                | Root         | Decoction             | Oral intake              |            |                    |
|                                                                     |               |                |                |                 |      | Tension                                                 | Whole plant  | Pounded               | Oral intake              |            |                    |
| <i>Costus phyllocephalus</i><br>K. Schum.                           | Minkeni       | Costaceae      | a, b, c        | 0.04            | 0.00 | Female infertility                                      | Stem         | Decoction             | Oral intake              | Herb       | Humid forest       |
|                                                                     |               |                |                |                 |      | Breastfeeding                                           | Stem         | Decoction             | Oral intake              |            |                    |
|                                                                     |               |                |                |                 |      | Acute nervousness                                       | Whole plant  | Pounded               | Oral intake              |            |                    |
|                                                                     |               |                |                |                 |      | Itchy skin rash                                         | Leaf         | Pounded               | External application     |            |                    |
|                                                                     |               |                |                |                 |      | Mastitis                                                | Whole plant  | Pounded               | Oral intake              |            |                    |
| <i>Craterispermum schweinfurthii</i> Hiern                          | Muntoma-ntoma | Rubiaceae      | a              | 0.01            | 0.00 | Mastitis                                                | Root         | Decoction             | Oral intake              | Shrub      | Forest recruit     |
|                                                                     |               |                |                |                 |      | Elephantiasis and yellowing of the hair                 | Leaf et Root | Decoction             | Oral intake              |            |                    |
|                                                                     |               |                |                |                 |      | Ovarian or tubal inflammation                           | Root         | Decoction             | Oral intake              |            |                    |
|                                                                     |               |                |                |                 |      | Hernia                                                  | Bark         | Infusion              | Anal route               |            |                    |
| <i>Crossopteryx febrifuga</i><br>(Afzel. Ex G. Don)<br>Benth.       | Mvala, Kigala | Rubiaceae      | a, b, c        | 0.04            | 0.00 | Laryngitis                                              | Bark         | Decoction             | Oral intake              | Shrub      | Savanna            |
|                                                                     |               |                |                |                 |      | Rheumatism                                              | Bark         | Decoction             | Oral intake              |            |                    |
|                                                                     |               |                |                |                 |      | Interruption of the menstruation without being pregnant | Bark         | Pounded               | Oral intake              |            |                    |
|                                                                     |               |                |                |                 |      | Female infertility                                      | Bark         | Maceration            | Oral intake              |            |                    |
|                                                                     |               |                |                |                 |      | Splenomegaly                                            | Leaf         | Raw state             | Oral intake              |            |                    |
| <i>Croton mubango</i><br>Müll.Arg.                                  | Mbangu mbangu | Euphorbiaceae  | b, c           | 0.02            | 0.00 | Testicular disappearance                                |              | Pounded               |                          |            |                    |
|                                                                     |               |                |                |                 |      | Gastritis                                               | Bark         | Decoction             | Oral intake              | Tree       | Field, home garden |
|                                                                     |               |                |                |                 |      | Dermatosis                                              |              | Powder                |                          |            |                    |
| <i>Cucurbita maxima</i><br>Duchesne                                 | Mbika malenge | Cucurbitaceae  | c              | 0.01            | 0.00 | Tuberculosis                                            |              | Maceration            |                          |            |                    |
|                                                                     |               |                |                |                 |      | Microfilariate                                          | Leaf         | Decoction             | Oral intake              | Liana      | Field, home garden |
| <i>Culcasia scandens</i> P. Beauv.                                  | Lulama lama   | Araceae        | b              | 0.01            | 0.00 | Alcoholism and smoking                                  | Leaf         | Powder                | Oral intake              | Herb       | Humid forest       |
|                                                                     |               |                |                |                 |      | Madness                                                 |              |                       |                          |            |                    |
| <i>Curcuma longa</i> L.                                             | Kingoni       | Zingiberaceae  | b              | 0.01            | 0.00 | Hernia                                                  | Rhizome      | Decoction             | Oral intake              | Herb       | Field, home garden |

Synoptic table of medicinal plants and their use in Kisantu and Mbanza-Ngungu terroirs  
(in which a “Kisantu”, B “Mbanza-Ngungu urban area and, c “Mbanza-Ngungu rural area”).

| Species                                                         | Local name             | Botanic family       | Recording area | UV <sub>s</sub> | IAR  | Disease                                                                                                                                           | Organ                  | Method of preparation | Method of administration | Morphology | Harvested area     |
|-----------------------------------------------------------------|------------------------|----------------------|----------------|-----------------|------|---------------------------------------------------------------------------------------------------------------------------------------------------|------------------------|-----------------------|--------------------------|------------|--------------------|
| <i>Cymbopogon citratus</i> (DC.) Stapf                          | Sinda di mputu         | <i>Poaceae</i>       | a, b, c        | 0.02            | 0.50 | Cough                                                                                                                                             | Leaf                   | Pounded, decoction    | Oral intake              | Herb       | Field, home garden |
|                                                                 |                        |                      |                |                 |      | Polio                                                                                                                                             |                        | Decoction             |                          |            |                    |
|                                                                 |                        |                      |                |                 |      | Hookworm                                                                                                                                          |                        | Powder                |                          |            |                    |
| <i>Cyperus articulatus</i> L.                                   | Lusaku saku            | <i>Cyperaceae</i>    | a, b, c        | 0.03            | 0.33 | Hemorrhoids                                                                                                                                       | Root                   | Infusion, macération  | Oral intake              | Herb       | Swamp              |
|                                                                 |                        |                      |                |                 |      | Enuresis                                                                                                                                          | Root                   | Decoction             |                          |            |                    |
|                                                                 |                        |                      |                |                 |      | Polio                                                                                                                                             | Root                   | Decoction             |                          |            |                    |
|                                                                 |                        |                      |                |                 |      | Skin rash                                                                                                                                         | Root                   | Maceration            |                          |            |                    |
|                                                                 |                        |                      |                |                 |      | Hookworm                                                                                                                                          | Root                   | Powder                |                          |            |                    |
| <i>Cyperus papyrus</i> L.                                       | Bù, Nkuala             | <i>Cyperaceae</i>    | a              | 0.01            | 0.00 | Migraine                                                                                                                                          | Stem                   | Powder                | Friction                 | Herb       | Swamp              |
|                                                                 |                        |                      |                |                 |      | Rheumatism                                                                                                                                        | Leaf                   | Powder                | Scarification            |            |                    |
| <i>Dacryodes edulis</i> (G.Don) H.J.Lam                         | Nsafu                  | <i>Burseraceae</i>   | a, b, c        | 0.05            | 0.00 | Repeated abortion or frequent delivery of stillbirths                                                                                             | Leaf                   | Maceration            | Enema                    | Tree       | Field, home garden |
|                                                                 |                        |                      |                |                 |      | Tooth decay                                                                                                                                       | Leaf                   | Decoction             | Fumigation               |            |                    |
|                                                                 |                        |                      |                |                 |      | Chronic scabies with itching and stink                                                                                                            | Leaf                   | Powder                | External application     |            |                    |
|                                                                 |                        |                      |                |                 |      | Headache                                                                                                                                          | Leaf                   | Powder                | Friction                 |            |                    |
|                                                                 |                        |                      |                |                 |      | Nephritis                                                                                                                                         | Leaf                   | Pounded               | Oral intake              |            |                    |
|                                                                 |                        |                      |                |                 |      | Testicular disappearance                                                                                                                          | Leaf                   | Decoction             | Oral intake              |            |                    |
|                                                                 |                        |                      |                |                 |      | Zoster                                                                                                                                            | Leaf                   | Powder                | External application     |            |                    |
|                                                                 |                        |                      |                |                 |      | Hernia                                                                                                                                            | Root                   | Decoction             | Oral intake              |            |                    |
| <i>Datura stramonium</i> L.                                     | 36 oiseaux             | <i>Solanaceae</i>    | a              | 0.01            | 1.00 | Tooth decay                                                                                                                                       | Fruit/semence          | Burnt                 | Fumigation               | Shrub      | Field, home garden |
| <i>Daucus carota</i> L.                                         | Kaloti                 | <i>Apiaceae</i>      | a              | 0.01            | 0.00 | Sexual weakness or impotence                                                                                                                      | Tuber                  | Pounded               | Application on the organ | Herb       | Field, home garden |
|                                                                 |                        |                      |                |                 |      | Splenomegaly                                                                                                                                      | Whole plant            |                       | Anal route               |            |                    |
| <i>Desmodium mauritanium</i> (Willd.) DC.                       | Lunzila nzila          | <i>Fabaceae</i>      | a              | 0.02            | 0.25 | Hernia                                                                                                                                            | Leaf, root             |                       | Oral intake              | Herb       | Ruderal            |
|                                                                 |                        |                      |                |                 |      | Pallor or dry skin, intermittent sever fevers, continuous diarrhea and loss of weigth of the baby due to infidelity by one of the parents (Sanga) | Leaf                   | Decoction             | Scarification            |            |                    |
|                                                                 |                        |                      |                |                 |      | Hookworm                                                                                                                                          | Leaf                   |                       | Oral intake              |            |                    |
| <i>Desmodium velutinum</i> subsp. <i>Velutinum</i> (Willd.) DC. | Lundondu               | <i>Fabaceae</i>      | a              | 0.01            | 0.00 | Hernia                                                                                                                                            | Root                   | Decoction             | Oral intake              | Herb       | Ruderal            |
|                                                                 |                        |                      |                |                 |      | Headache                                                                                                                                          | Leaf                   | Crushed               | Friction                 |            |                    |
| <i>Dichrostachys cinerea</i> (L.) Wight & Arn.                  | Nsendi vanga           | <i>Fabaceae</i>      | b              | 0.02            | 0.00 | Poisoning                                                                                                                                         | Leaf                   | Decoction             | Oral intake              | Shrub      | Savanna            |
|                                                                 |                        |                      |                |                 |      | Hookworm                                                                                                                                          | Leaf                   | Powder                |                          |            |                    |
|                                                                 |                        |                      |                |                 |      | Gastritis                                                                                                                                         | Root                   | Decoction             |                          |            |                    |
| <i>Dioscorea cayenensis</i> Lam.                                | Kisadi                 | <i>Dioscoreaceae</i> | a, b           | 0.02            | 0.00 | Hernia                                                                                                                                            | Thorn                  | Decoction             | Oral intake              | Liana      | Field, home garden |
|                                                                 |                        |                      |                |                 |      | Sciatic neuralgia                                                                                                                                 |                        | Infusion              |                          |            |                    |
|                                                                 |                        |                      |                |                 |      | Hookworm                                                                                                                                          |                        | Powder                |                          |            |                    |
| <i>Dioscorea smilacifolia</i> De Wild. & T.Durand               | Ngolo                  | <i>Dioscoreaceae</i> | a              | 0.01            | 1.00 | Sexual weakness or impotence                                                                                                                      | Thorn<br>Fruit/semence | Powder                | Oral intake              | Liana      | Humid forest       |
| <i>Dioscorea bulbifera</i> L.                                   | Nsoko ngamba, kimasoko | <i>Dioscoreaceae</i> | b              | 0.01            | 0.00 | Diabetes                                                                                                                                          | Tuber                  | Decoction             | Oral intake              | Liana      | Field, home garden |

Synoptic table of medicinal plants and their use in Kisantu and Mbanza-Ngungu terroirs  
(in which a “Kisantu”, B “Mbanza-Ngungu urban area and, c “Mbanza-Ngungu rural area”).

| Species                                | Local name         | Botanic family         | Recording area       | UV <sub>s</sub> | IAR  | Disease                        | Organ                     | Method of preparation | Method of administration               | Morphology | Harvested area |
|----------------------------------------|--------------------|------------------------|----------------------|-----------------|------|--------------------------------|---------------------------|-----------------------|----------------------------------------|------------|----------------|
| <i>Dissotis brazzae</i> Cogn.          | Ntongu ntongu      | <i>Melastomataceae</i> | a                    | 0.01            | 0.00 | Rheumatism                     | Leaf                      | Decoction             | Oral intake                            | Herb       | Savanna        |
| <i>Dorstenia psilurus</i> Welw.        | Kintamba           | <i>Moraceae</i>        | b, c                 | 0.02            | 0.00 | Hookworm                       | Root                      | Decoction             | Oral intake                            | Herb       | Forest gallery |
|                                        |                    |                        |                      |                 |      | Erectil malfunction            |                           | Decoction             | Oral intake                            |            |                |
|                                        |                    |                        |                      |                 |      | Mastitis                       |                           | Pounded               | Friction                               |            |                |
| <i>Dracaena mannii</i> Baker           | Boma libala        | <i>Asparagaceae</i>    | b                    | 0.01            | 0.00 | Smallpox                       | Bark                      | Decoction             | Anal route                             | Shrub      | Forest gallery |
|                                        |                    |                        |                      |                 |      | Pneumonia                      | Fruit/semence             | Pounded               | Friction                               |            |                |
|                                        |                    |                        |                      |                 |      | Splenomegaly                   | Fruit/semence             | Oil, raw state, paste | Oral intake, scarification, anal route |            |                |
|                                        |                    |                        |                      |                 |      | Buruli ulcer                   | Fruit/semence             | Pounded               | External application                   |            |                |
|                                        |                    |                        |                      |                 |      | Amoebiasis                     | Fruit/semence             | Raw state             | Oral intake                            |            |                |
|                                        |                    |                        |                      |                 |      | Vitiligo                       | Fruit/semence             | Oil                   | Oral intake, External application      |            |                |
|                                        |                    |                        |                      |                 |      | Breast care to keep it upright | Fruit/semence             | Powder                | Scarification                          |            |                |
|                                        |                    |                        |                      |                 |      | Sexual weakness or impotence   | Root                      | Pounded               | Oral intake                            |            |                |
|                                        |                    |                        |                      |                 |      | Migraine                       | Fruit/semence             | Pounded               | Friction                               |            |                |
|                                        |                    |                        |                      |                 |      | Sciatic neuralgia              | Fruit/semence             | Pounded               | Friction                               |            |                |
|                                        |                    |                        |                      |                 |      | Tooth decay                    | Fruit/semence             | Burnt                 | Fumigation                             |            |                |
|                                        |                    |                        |                      |                 |      | Headache                       | Fruit/semence             | Pounded               | Friction                               |            |                |
|                                        |                    |                        |                      |                 |      | Ache                           | Fruit/semence             | Pounded               | Friction                               |            |                |
|                                        |                    |                        |                      |                 |      | Chest or intercostal pain      | Fruit/semence             | Pounded               | Friction                               |            |                |
|                                        |                    |                        |                      |                 |      | Amoebiasis                     | Fruit/semence, sève/latex | Decoction, pounded    | Oral intake                            |            |                |
|                                        |                    |                        |                      |                 |      | Sciatic neuralgia              | Fruit/semence             | Oil                   | Oral intake                            |            |                |
|                                        |                    |                        |                      |                 |      | Hemorrhoids                    | Fruit/semence             | Ointment              | Anal route                             |            |                |
|                                        |                    |                        |                      |                 |      | Premature ejaculation          | Fruit/semence             | Raw state             | Oral intake                            |            |                |
|                                        |                    |                        |                      |                 |      | Testicular disappearance       | Latex/sap                 | Decoction             | Oral intake                            |            |                |
|                                        |                    |                        |                      |                 |      | Hernia                         | Latex/sap                 | Decoction             | Oral intake                            |            |                |
| Madness                                | Latex/sap          | Decoction              | Oral intake          |                 |      |                                |                           |                       |                                        |            |                |
| Chronic scabies with itching and stink | Latex/sap          | Raw state              | Friction             |                 |      |                                |                           |                       |                                        |            |                |
| Diabetes                               | Latex/sap          | Decoction              | Oral intake          |                 |      |                                |                           |                       |                                        |            |                |
| Frigidity and narrowing of the vagina  | Latex/sap          | Decoction              | Oral intake          |                 |      |                                |                           |                       |                                        |            |                |
| Whitlow                                | Fruit/semence      | Pounded                | External application |                 |      |                                |                           |                       |                                        |            |                |
| Rheumatism                             | Fruit/semence      | Powder                 | Massage              |                 |      |                                |                           |                       |                                        |            |                |
| Asthma                                 | Leaf               | Decoction              | Oral intake          |                 |      |                                |                           |                       |                                        |            |                |
| Epilepsy                               | Latex/sap          | Maceration             | Oral intake          |                 |      |                                |                           |                       |                                        |            |                |
| Yellow fever                           | Latex/sap          | Pounded                | Anal route           |                 |      |                                |                           |                       |                                        |            |                |
|                                        |                    |                        |                      |                 |      | Gastritis                      | Leaf                      | Decoction             | Oral intake                            |            |                |
| <i>Eleusine indica</i> (L.) Gaertn.    | Kimbansi, Lumvumvu | <i>Poaceae</i>         | a, b                 | 0.03            | 0.38 | Migraine                       | Whole plant               | Maceration, pounded   | Friction                               | Herb       | Ruderal        |
|                                        |                    |                        |                      |                 |      | Chest or intercostal pain      | Leaf, whole plant         | Pounded               | Friction                               |            |                |
|                                        |                    |                        |                      |                 |      | Splenomegaly                   | Root, whole plant         | Pounded               | Scarification                          |            |                |
|                                        |                    |                        |                      |                 |      | Prostate                       | Whole plant               | Decoction             | Oral intake                            |            |                |
|                                        |                    |                        |                      |                 |      | Asthma                         | Leaf                      | Decoction             | Oral intake                            |            |                |
| Gastritis                              | Whole plant        | Decoction              | Oral intake          |                 |      |                                |                           |                       |                                        |            |                |



Synoptic table of medicinal plants and their use in Kisantu and Mbanza-Ngungu terroirs  
(in which a “Kisantu”, B “Mbanza-Ngungu urban area and, c “Mbanza-Ngungu rural area”).

| Species                                                 | Local name        | Botanic family       | Recording area | UV <sub>s</sub> | IAR  | Disease                                                                                                                                                                                                                                       | Organ                                 | Method of preparation                                                              | Method of administration                                                                                                | Morphology | Harvested area     |
|---------------------------------------------------------|-------------------|----------------------|----------------|-----------------|------|-----------------------------------------------------------------------------------------------------------------------------------------------------------------------------------------------------------------------------------------------|---------------------------------------|------------------------------------------------------------------------------------|-------------------------------------------------------------------------------------------------------------------------|------------|--------------------|
| <i>Emilia coccinea</i> (Sims) G.Don                     | Nkofi masa        | <i>Asteraceae</i>    | b              | 0.01            | 0.00 | Repeated abortion or frequent delivery of stillbirths                                                                                                                                                                                         | Root                                  | Decoction                                                                          | Oral intake                                                                                                             | Herb       | Ruderal            |
| <i>Erigeron floribundus</i> (Kunth) Sch.Bip.            | Fumu di Kyula     | <i>Asteraceae</i>    | a, b           | 0.02            | 0.00 | Hemorrhoids<br>Mastitis<br>Microfilariae<br>Migraine                                                                                                                                                                                          | Whole plant                           | Pounded<br>Decoction<br>Decoction<br>Maceration                                    | Anal route<br>Oral intake<br>Oral intake<br>Enema                                                                       | Herb       | Ruderal            |
| <i>Eriosema glomeratum</i> (Guill. Et Perr.) Hook.f.    | Wandu nseke       | <i>Fabaceae</i>      | b              | 0.01            | 0.00 | Hernia                                                                                                                                                                                                                                        | Root                                  | Powder                                                                             | Oral intake                                                                                                             | Herb       | Savanna            |
| <i>Erythrina abyssinica</i> Lam.                        | Kikumbu ki Nzambi | <i>Fabaceae</i>      | a, c           | 0.02            | 0.00 | Anemia<br>Madness<br>Edema and yellowing of the hair                                                                                                                                                                                          | Leaf<br>Bark<br>Leaf                  | Decoction<br>Pounded<br>Decoction                                                  | Oral intake                                                                                                             | Tree       | Savanna            |
| <i>Erythrococca atrovirens</i> (Pax) Prain              | Nzeke nzeke       | <i>Euphorbiaceae</i> | a              | 0.01            | 0.00 | Chest or intercostal pain<br>Asthma                                                                                                                                                                                                           | Leaf                                  | Pounded<br>Powder                                                                  | Friction<br>Oral intake                                                                                                 | Shrub      | Forest recruit     |
| <i>Erythrophleum suaveolens</i> (Guill. & Perr.) Brenan | Nkasa, epomi      | <i>Fabaceae</i>      | a              | 0.01            | 0.00 | Matrix cancer<br>Rheumatism                                                                                                                                                                                                                   | Root<br>Leaf                          | Decoction<br>Powder                                                                | Fumigation<br>Scarification                                                                                             | Tree       | Forest gallery     |
| <i>Euphorbia candelabrum</i> Trémaux ex Kotschy         | Songe             | <i>Euphorbiaceae</i> | b              | 0.01            | 0.00 | Epilepsy                                                                                                                                                                                                                                      | Leaf                                  | Trituration                                                                        | Massage                                                                                                                 | Shrub      | Ruderal            |
| <i>Ficus lutea</i> Vahl                                 | Bubu              | <i>Moraceae</i>      | a              | 0.01            | 0.00 | Chronic scabies with itching and stink                                                                                                                                                                                                        | Bark                                  | Powder                                                                             | External application                                                                                                    | Tree       | Forest gallery     |
| <i>Ficus thonningii</i> Blume                           | Nsanda            | <i>Moraceae</i>      | a, c           | 0.01            | 0.00 | Pertussis<br>Headache                                                                                                                                                                                                                         | Leaf<br>Root                          | Decoction<br>Ointment                                                              | Oral intake<br>Friction                                                                                                 | Tree       | Humid forest       |
| <i>Gaertnera paniculata</i> Benth.                      | Kimbodya          | <i>Rubiaceae</i>     | b              | 0.01            | 0.00 | Cough                                                                                                                                                                                                                                         | Bark                                  | Decoction                                                                          | Oral intake                                                                                                             | Shrub      | Forest recruit     |
| <i>Garcinia huillensis</i> Welw. ex Oliv.               | Kisima            | <i>Clusiaceae</i>    | a, c           | 0.01            | 0.00 | Diabetes<br>Erectil malfunction                                                                                                                                                                                                               | Leaf<br>Fruit/semence                 | Pounded<br>Decoction                                                               | Oral intake                                                                                                             | Shrub      | Savanna            |
| <i>Garcinia kola</i> Heckel                             | Ngadiadia         | <i>Clusiaceae</i>    | c              | 0.01            | 1.00 | Epilepsy                                                                                                                                                                                                                                      | Fruit/semence                         | Powder                                                                             | Oral intake                                                                                                             | Shrub      | Field, home garden |
| <i>Gardenia ternifolia</i> Schumach. & Thonn. Subsp.    | Kilemba nzau      | <i>Rubiaceae</i>     | a, b, c        | 0.02            | 0.40 | Sexual weakness or impotence<br>Hernia<br>Tooth decay<br>Chest or intercostal pain                                                                                                                                                            | Root<br>Root<br>Fruit/semence<br>Bark | Pounded, decoction<br>Decoction<br>Infusion<br>Pounded                             | Oral intake<br>Oral intake<br>Gargle<br>Oral intake                                                                     | Shrub      | Savanna            |
| <i>Gnetum africanum</i> Welw.                           | Mfumbu            | <i>Gnetaceae</i>     | a              | 0.01            | 0.00 | Diabetes                                                                                                                                                                                                                                      | Leaf                                  | Powder                                                                             | Oral intake                                                                                                             | Liana      | Forest gallery     |
| <i>Gossypium barbadense</i> L.                          | Gusu              | <i>Malvaceae</i>     | a, b, c        | 0.05            | 0.10 | Tooth decay<br>Heaviness in the head, seems to split in the baby<br>Breast care to keep it upright<br>Lack of uvula causing the baby to cry continuously<br>Chest or intercostal pain<br>Laryngitis<br>Chronic scabies with itching and stink | Leaf                                  | Decoction<br>Maceration<br>Powder<br>Maceration<br>Pounded<br>Maceration<br>Powder | Oral intake<br>Oral intake<br>Scarification<br>Oral intake<br>Friction<br>Oral intake<br>Friction, external application | Shrub      | Field, home garden |

Synoptic table of medicinal plants and their use in Kisantu and Mbanza-Ngungu terroirs  
(in which a “Kisantu”, B “Mbanza-Ngungu urban area and, c “Mbanza-Ngungu rural area”).

| Species                              | Local name      | Botanic family       | Recording area | UV <sub>s</sub> | IAR  | Disease                               | Organ         | Method of preparation | Method of administration              | Morphology | Harvested area     |
|--------------------------------------|-----------------|----------------------|----------------|-----------------|------|---------------------------------------|---------------|-----------------------|---------------------------------------|------------|--------------------|
|                                      |                 |                      |                |                 |      | Enuresis                              |               | Decoction             | Oral intake                           |            |                    |
|                                      |                 |                      |                |                 |      | Skin rash                             |               | Maceration            | Oral intake                           |            |                    |
|                                      |                 |                      |                |                 |      | Tuberculosis                          |               | Maceration            | Oral intake                           |            |                    |
| <i>Habenaria laurentii</i> De Wild.  | Mumpemba        | <i>Orchidaceae</i>   | c              | 0.01            | 0.00 | Erectil malfunction                   | Leaf          | Powder                | Scarification                         | Herb       | Forest gallery     |
|                                      |                 |                      |                |                 |      | Sexual weakness or impotence          |               | Pounded               |                                       |            |                    |
|                                      |                 |                      |                |                 |      | Hernia                                |               | Decoction, macération | Oral intake                           | Tree       | Swamp forest       |
|                                      |                 |                      |                |                 |      | Hemorrhoids                           | Bark          | Pounded               |                                       |            |                    |
|                                      |                 |                      |                |                 |      | Female infertility                    |               | Decoction             |                                       |            |                    |
|                                      |                 |                      |                |                 |      | Mastitis                              |               | Decoction             |                                       |            |                    |
|                                      |                 |                      |                |                 |      | Diarrhea                              | Bud           | Raw state             |                                       |            |                    |
|                                      |                 |                      |                |                 |      | Jaundice                              | Bark          | Decoction             | Oral intake                           | Shrub      | Forest fallow      |
|                                      |                 |                      |                |                 |      | Gonorrhoea                            | Bark          | Decoction             |                                       |            |                    |
|                                      |                 |                      |                |                 |      | Hemorrhoids                           | Root          | Maceration            |                                       |            |                    |
|                                      |                 |                      |                |                 |      | Hemorrhoids                           |               | Decoction             |                                       |            |                    |
|                                      |                 |                      |                |                 |      | Sexual weakness or impotence          |               | Decoction             |                                       |            |                    |
|                                      |                 |                      |                |                 |      | Premature ejaculation                 |               | Decoction             |                                       |            |                    |
|                                      |                 |                      |                |                 |      | Madness                               | Root          | Pounded               | Oral intake                           | Shrub      | Forest recruit     |
|                                      |                 |                      |                |                 |      | Rheumatism                            |               | Decoction             |                                       |            |                    |
|                                      |                 |                      |                |                 |      | Erectil malfunction                   |               | Decoction             |                                       |            |                    |
|                                      |                 |                      |                |                 |      | Mastitis                              |               | Decoction             |                                       |            |                    |
|                                      |                 |                      |                |                 |      | Hernia                                |               | Decoction             |                                       |            |                    |
|                                      |                 |                      |                |                 |      | Gastritis                             |               | Decoction             |                                       |            |                    |
| <i>Helichrysum mechowianum</i> Klatt | Ludimi lua mbua | <i>Asteraceae</i>    | a              | 0.01            | 0.00 | Circumcision                          | Leaf          | Buckling              | External application                  | Herb       | Savanna            |
|                                      |                 |                      |                |                 |      | Female infertility                    | Root          | Decoction             |                                       |            |                    |
|                                      |                 |                      |                |                 |      | Epistaxis with sometimes sudden death | Leaf          | Decoction             | Oral intake                           | Herb       | Field, home garden |
|                                      |                 |                      |                |                 |      | Mastitis                              | Leaf          | Pounded               |                                       |            |                    |
|                                      |                 |                      |                |                 |      | Sexual weakness or impotence          | Bark, root    | Pounded               | Application on the organ, oral intake |            |                    |
|                                      |                 |                      |                |                 |      | Tooth decay                           | Bark          | Decoction             | Gargle                                |            |                    |
|                                      |                 |                      |                |                 |      | Breastfeeding                         | Leaf          | Decoction             | Oral intake                           |            |                    |
|                                      |                 |                      |                |                 |      | Wound                                 | Bark          | Powder                | Enema                                 | Shrub      | Savanna            |
|                                      |                 |                      |                |                 |      | Otitis                                | Fruit/semence | Trituration           | Instillation                          |            |                    |
|                                      |                 |                      |                |                 |      | Diarrhea                              | Root          | Decoction             | Oral intake                           |            |                    |
|                                      |                 |                      |                |                 |      | Anemia                                | Bark          | Decoction             | Oral intake                           |            |                    |
|                                      |                 |                      |                |                 |      | Hernia                                | Root          | Decoction             | Oral intake                           |            |                    |
|                                      |                 |                      |                |                 |      | Rheumatism                            | Leaf          | Ointment              | Massage                               | Herb       | Ruderal            |
|                                      |                 |                      |                |                 |      | Epilepsy                              |               | Raw state             | Oral intake                           |            |                    |
| <i>Impatiens irvingii</i> Hook.f.    | Nsa lua nsa     | <i>Balsaminaceae</i> | b              | 0.01            | 0.00 | Headache                              | Bark          | Trituration           | Instillation                          | Herb       | Ruderal            |
|                                      |                 |                      |                |                 |      | Asthma                                |               | Powder                |                                       |            |                    |
|                                      |                 |                      |                |                 |      | Sciatic neuralgia                     | Root          | Decoction             | Oral intake                           | Herb       | Savanna            |
|                                      |                 |                      |                |                 |      | Sexual weakness or impotence          |               | Infusion              |                                       |            |                    |

Synoptic table of medicinal plants and their use in Kisantu and Mbanza-Ngungu terroirs  
(in which a “Kisantu”, B “Mbanza-Ngungu urban area and, c “Mbanza-Ngungu rural area”).

| Species                                           | Local name    | Botanic family       | Recording area | UV <sub>s</sub> | IAR  | Disease                                              | Organ           | Method of preparation                                    | Method of administration             | Morphology | Harvested area        |
|---------------------------------------------------|---------------|----------------------|----------------|-----------------|------|------------------------------------------------------|-----------------|----------------------------------------------------------|--------------------------------------|------------|-----------------------|
| <i>Indigofera capitata</i><br>Kotschy             | Nkeka za ngo  | <i>Fabaceae</i>      | a              | 0.01            | 0.00 | Diabetes                                             | Whole plant     | Powder                                                   | Oral intake                          | Herb       | Savanna               |
| <i>Jatropha curcas</i> L.                         | Mpuluka kongo | <i>Euphorbiaceae</i> | a, b, c        | 0.03            | 0.20 | Gastritis                                            | Latex/sap, leaf | Maceration, decoction                                    | Oral intake                          | Tree       | Field,<br>home garden |
|                                                   |               |                      |                |                 |      | Hemorrhoids                                          | Leaf            | Decoction                                                | Oral intake                          |            |                       |
|                                                   |               |                      |                |                 |      | Diarrhea                                             | Fruit/semence   | Raw state                                                | Oral intake                          |            |                       |
|                                                   |               |                      |                |                 |      | Madness                                              | Leaf            | Pounded                                                  | Oral intake                          |            |                       |
|                                                   |               |                      |                |                 |      | Prostate                                             | Leaf            | Maceration                                               | Oral intake                          |            |                       |
| <i>Kalaharia uncinata</i><br>(Schinz) Moldenke    | Nkongi Nkongi | <i>Lamiaceae</i>     | a, b, c        | 0.02            | 0.25 | Laryngitis                                           | Root            | Decoction                                                | Oral intake                          | Tree       | Savanna               |
|                                                   |               |                      |                |                 |      | Nephritis                                            |                 | Pounded                                                  |                                      |            |                       |
|                                                   |               |                      |                |                 |      | Testicular disappearance                             |                 | Decoction                                                |                                      |            |                       |
|                                                   |               |                      |                |                 |      | Hernia                                               |                 | Decoction                                                |                                      |            |                       |
| <i>Landolphia camptoloba</i><br>(K.Schum.) Pichon | Mbungu mbungu | <i>Apocynaceae</i>   | a              | 0.01            | 0.00 | Asthma                                               | Leaf            | Powder                                                   | Oral intake                          | Liana      | Savanna               |
| <i>Landolphia owariensis</i><br>P.Beauv.          | Goki di kuku  | <i>Apocynaceae</i>   | c              | 0.01            | 0.00 | Hemorrhoids                                          | Fruit/semence   | Infusion                                                 | Oral intake                          | Liana      | Savanna               |
| <i>Lamea antiscorbutica</i><br>(Hiern) Engl.      | Nkumbi        | <i>Anacardiaceae</i> | a, b           | 0.01            | 0.00 | Chronic scabies with<br>itching and stink            | Leaf            | Powder                                                   | Friction                             | Tree       | Savanna               |
|                                                   |               |                      |                |                 |      | Tooth decay                                          | Bark            | Decoction                                                | Fumigation                           |            |                       |
| <i>Lantana camara</i> L.                          | Nsudi nsudi   | <i>Verbenaceae</i>   | a, c           | 0.01            | 0.50 | Cough                                                | Leaf            | Pounded, decoction                                       | Oral intake                          | Shrub      | Ruderal               |
|                                                   |               |                      |                |                 |      | Hemorrhoids                                          | Leaf, fruit     | Pounded                                                  | Anal route                           |            |                       |
| <i>Lasimorpha senegalensis</i> Schott             | Kilodia       | <i>Araceae</i>       | b              | 0.01            | 0.00 | Malnutrition and<br>kwashiorkor                      | Leaf            | Decoction                                                | Oral intake                          | Herb       | Swamp forest          |
| <i>Lippia multiflora</i><br>Moldenke              | Bulukutu      | <i>Verbenaceae</i>   | a, c           | 0.01            | 0.50 | Epilepsy                                             | Leaf            | Powder                                                   | Oral intake                          | Shrub      | Field,<br>home garden |
|                                                   |               |                      |                |                 |      | Diabetes                                             |                 | Decoction                                                |                                      |            |                       |
| <i>Luffa cylindrica</i> (L.)<br>M.Roem.           | Tsanu         | <i>Cucurbitaceae</i> | b              | 0.01            | 0.00 | Gonorrhea                                            | Leaf            | Maceration                                               | Oral intake                          | Liana      | Ruderal               |
| <i>Lygodium microphyllum</i> (Cav.)<br>R.Br.      | Kizola nkata  | <i>Lygodiaceae</i>   | b              | 0.01            | 0.00 | Amoebiasis                                           | Leaf            | Decoction                                                | Oral intake                          | Liana      | Humid forest          |
| <i>Macaranga schweinfurthii</i> Pax               | Mfumfu        | <i>Euphorbiaceae</i> | b              | 0.01            | 0.00 | Healing                                              | Latex/sap       | Raw state                                                | External application                 | Tree       | Humid forest          |
| <i>Macaranga spinosa</i><br>Müll.Arg.             | Sasa          | <i>Euphorbiaceae</i> | b              | 0.01            | 0.00 | Hemorrhoids                                          | Root            | Powder                                                   | Anal route                           | Tree       | Humid forest          |
| <i>Undetermined</i>                               | Malungula     | -                    | b              | 0.01            | 0.00 | Anemia                                               | Leaf            | Decoction                                                | Oral intake                          | Herb       | Savanna               |
| <i>Mangifera indica</i> L.                        | Manga         | <i>Anacardiaceae</i> | a, b, c        | 0.02            | 0.75 | Hemorrhoids                                          | Bark, Root      | Infusion, decoction,<br>pounded, ointment,<br>maceration | Oral intake                          | Tree       | Field,<br>home garden |
|                                                   |               |                      |                |                 |      | Gonorrhea                                            | Bark            | Decoction                                                | Oral intake                          |            |                       |
|                                                   |               |                      |                |                 |      | Hernia                                               | Bark            | Maceration                                               | Oral intake                          |            |                       |
|                                                   |               |                      |                |                 |      | Laryngitis                                           | Leaf            | Decoction                                                | Oral intake                          |            |                       |
|                                                   |               |                      |                |                 |      | Migraine                                             | Stem            | Powder                                                   | Friction                             |            |                       |
| <i>Manihot esculenta</i><br>Crantz                | Dioko         | <i>Euphorbiaceae</i> | a, c           | 0.05            | 0.00 | Sexual weakness or<br>impotence                      | Tuber           | Pounded                                                  | Oral intake                          | Shrub      | Field,<br>home garden |
|                                                   |               |                      |                |                 |      | Headache                                             | Stem            | Powder                                                   | Friction                             |            |                       |
|                                                   |               |                      |                |                 |      | Heaviness in the head,<br>seems to split in the baby | Leaf            | Maceration                                               | Oral intake                          |            |                       |
|                                                   |               |                      |                |                 |      | Vitiligo                                             | Stem            | Powder                                                   | Oral intake, external<br>application |            |                       |

Synoptic table of medicinal plants and their use in Kisantu and Mbanza-Ngungu terroirs  
(in which a “Kisantu”, B “Mbanza-Ngungu urban area and, c “Mbanza-Ngungu rural area”).

| Species                                       | Local name              | Botanic family       | Recording area | UV <sub>s</sub> | IAR  | Disease                                                    | Organ             | Method of preparation | Method of administration | Morphology | Harvested area |
|-----------------------------------------------|-------------------------|----------------------|----------------|-----------------|------|------------------------------------------------------------|-------------------|-----------------------|--------------------------|------------|----------------|
|                                               |                         |                      |                |                 |      | Repeated abortion or frequent delivery of stillbirths      | Leaf              | Maceration            | Enema                    |            |                |
|                                               |                         |                      |                |                 |      | Amoebiasis                                                 | Tuber             | Pounded               | Oral intake              |            |                |
|                                               |                         |                      |                |                 |      | Hernia                                                     | Tuber             | Raw state             | Oral intake              |            |                |
|                                               |                         |                      |                |                 |      | Conjunctivitis and cataract                                | Tuber             | Pounded               | Instillation             |            |                |
| <i>Manotes expansa</i> Sol. ex Planch.        | Dila dila               | <i>Connaraceae</i>   | b              | 0.01            | 0.00 | Anemia                                                     | Leaf              | Decoction             | Oral intake              | Liana      | Forest recruit |
|                                               |                         |                      |                |                 |      | Female infertility                                         | Bark              | Decoction             | Oral intake              |            |                |
| <i>Maprounea africana</i> Müll.Arg.           | Kisiedi-siedi           | <i>Euphorbiaceae</i> | a, b           | 0.02            | 0.00 | Tooth decay                                                | Bark              | Decoction             | Gargle                   | Shrub      | Savanna        |
|                                               |                         |                      |                |                 |      | Splenomegaly                                               | Root              | Raw state             | Oral intake              |            |                |
| <i>Melinis minutiflora</i> P. Beauv.          | Maleka mbua             | <i>Poaceae</i>       | a              | 0.01            | 0.00 | Hernia                                                     | Leaf              | Decoction             | Oral intake              | Herb       | Savanna        |
|                                               |                         |                      |                |                 |      | Sciatic neuralgia                                          | Leaf              | Pounded               | Friction                 |            |                |
|                                               |                         |                      |                |                 |      | Female infertility                                         | Bark              | Decoction             | Oral intake              |            |                |
| <i>Milicia excelsa</i> (Welw.) C.C. Berg      | Nkamba, Kambala         | <i>Moraceae</i>      | a, b, c        | 0.02            | 0.00 | Rheumatism                                                 | Bark              | Decoction             | Friction                 | Tree       | Forest gallery |
|                                               |                         |                      |                |                 |      | Hernia                                                     | Bark              | Maceration            | Oral intake              |            |                |
|                                               |                         |                      |                |                 |      | Mastitis                                                   | Leaf              | Decoction             | Oral intake              |            |                |
| <i>Millettia laurentii</i> De Wild.           | Kiboto                  | <i>Fabaceae</i>      | a              | 0.01            | 0.00 | Diabetes                                                   | Bark              | Decoction             | Oral intake              | Tree       | Forest recruit |
|                                               |                         |                      |                |                 |      | Tooth decay                                                |                   | Pounded               | Application on the organ |            |                |
| <i>Millettia eetveldeana</i> (Micheli) Hauman | Mbuenge                 | <i>Fabaceae</i>      | a, b, c        | 0.02            | 0.00 | Laryngitis                                                 | Root              | Decoction             | Oral intake              | Tree       | Forest recruit |
|                                               |                         |                      |                |                 |      | Hemorrhoids                                                |                   | Maceration            | Oral intake              |            |                |
|                                               |                         |                      |                |                 |      | Otitis                                                     |                   | Pounded               | Instillation             |            |                |
|                                               |                         |                      |                |                 |      | Repeated abortion or frequent delivery of stillbirths      | Leaf              | Maceration            | Enema                    | Tree       | Forest recruit |
| <i>Millettia versicolor</i> Welw. ex Baker    | Mbota                   | <i>Fabaceae</i>      | a, b           | 0.02            | 0.00 | Hemorrhoids                                                | Leaf              | Decoction             | Oral intake              |            |                |
|                                               |                         |                      |                |                 |      | Mycosis                                                    |                   | Maceration            | External application     |            |                |
|                                               |                         |                      |                |                 |      | Epilepsy                                                   |                   | Raw state             | Oral intake              |            |                |
| <i>Mimosa pudica</i> L.                       | Kifua ngambu, Kanga nzô | <i>Fabaceae</i>      | a, c           | 0.01            | 0.00 | Hemorrhoids                                                | Whole plant       | Powder                | Oral intake              | Herb       | Ruderal        |
|                                               |                         |                      |                |                 |      | Lack of voice in children                                  | Leaf              | Infusion              | Oral intake              |            |                |
|                                               |                         |                      |                |                 |      | Mycosis                                                    |                   | Maceration            | External application     |            |                |
| <i>Mitracarpus hirtus</i> (L.) DC.            | Banda nzazi             | <i>Rubiaceae</i>     | b, c           | 0.02            | 0.00 | Head lice                                                  | Leaf              | Decoction             | External application     | Herb       | Ruderal        |
|                                               |                         |                      |                |                 |      | Zoster                                                     | Leaf              | Powder                | External application     |            |                |
|                                               |                         |                      |                |                 |      | Epilepsy                                                   |                   | Trituration           | Instillation             |            |                |
|                                               |                         |                      |                |                 |      | Mastitis                                                   | Leaf, whole plant | Decoction, pounded    | Oral intake              |            |                |
|                                               |                         |                      |                |                 |      | Microfilariae                                              | Leaf, whole plant | Decoction, maceration | Oral intake              |            |                |
|                                               |                         |                      |                |                 |      | Sciatic neuralgia                                          | Leaf              | Decoction             | Oral intake              |            |                |
|                                               |                         |                      |                |                 |      | Chronic scabies with itching and stink                     | Leaf              | Powder                | External application     |            |                |
|                                               |                         |                      |                |                 |      | Headache                                                   | Leaf              | Powder                | Friction                 |            |                |
| <i>Momordica charantia</i> L.                 | Lumbusu                 | <i>Cucurbitaceae</i> | a, b, c        | 0.05            | 0.18 | Measles                                                    | Whole plant       | Maceration            | Enema                    | Liana      | Ruderal        |
|                                               |                         |                      |                |                 |      | Hemorrhoids                                                | Whole plant       | Maceration            | Anal route               |            |                |
|                                               |                         |                      |                |                 |      | Skin rash                                                  | Whole plant       | Maceration            | Oral intake              |            |                |
|                                               |                         |                      |                |                 |      | Tuberculosis                                               | Whole plant       | Maceration            | Oral intake              |            |                |
|                                               |                         |                      |                |                 |      | Prolonged crying of the baby due to intestinal parasitosis | Leaf              | Maceration            | Enema                    |            |                |

Synoptic table of medicinal plants and their use in Kisantu and Mbanza-Ngungu terroirs  
(in which a “Kisantu”, B “Mbanza-Ngungu urban area and, c “Mbanza-Ngungu rural area”).

| Species                                           | Local name    | Botanic family                 | Recording area | UV <sub>s</sub> | IAR  | Disease                                 | Organ             | Method of preparation | Method of administration | Morphology | Harvested area |
|---------------------------------------------------|---------------|--------------------------------|----------------|-----------------|------|-----------------------------------------|-------------------|-----------------------|--------------------------|------------|----------------|
| <i>Mondia whitei</i><br>(Hook.f.) Skeels          | Kimbiolongo   | <i>Apocynaceae</i>             | a, b, c        | 0.10            | 0.25 | Ascites                                 | Root              | Decoction             | Oral intake              | Liana      | Forest gallery |
|                                                   |               |                                |                |                 |      | Cough                                   | Whole plant       | Decoction             |                          |            |                |
|                                                   |               |                                |                |                 |      | Elephantiasis and yellowing of the hair | Root              | Decoction             |                          |            |                |
|                                                   |               |                                |                |                 |      | Hemorrhoids                             | Root              | Decoction             |                          |            |                |
|                                                   |               |                                |                |                 |      | Microfilariae                           | Root              | Decoction             |                          |            |                |
|                                                   |               |                                |                |                 |      | Itchy skin rash                         | Root, whole plant | Maceration, pounded   |                          |            |                |
|                                                   |               |                                |                |                 |      | Enuresis                                | Root              | Decoction             |                          |            |                |
|                                                   |               |                                |                |                 |      | Epistaxis with sometimes sudden death   | Root              | Decoction             |                          |            |                |
|                                                   |               |                                |                |                 |      | Hookworm                                | Whole plant       | Decoction             |                          |            |                |
|                                                   |               |                                |                |                 |      | Erectil malfunction                     | Root              | Decoction             |                          |            |                |
|                                                   |               |                                |                |                 |      | Gastritis                               | Root              | Decoction, maceration |                          |            |                |
|                                                   |               |                                |                |                 |      | Rheumatism                              | Root              | Decoction             |                          |            |                |
|                                                   |               |                                |                |                 |      | Nephritis                               | Root              | Pounded               |                          |            |                |
|                                                   |               |                                |                |                 |      | Anemia                                  | Whole plant       | Decoction             |                          |            |                |
|                                                   |               |                                |                |                 |      | Gonorrhoea                              | Whole plant       | Decoction             |                          |            |                |
|                                                   |               |                                |                |                 |      | Testicular disappearance                | Whole plant       | Decoction             |                          |            |                |
|                                                   |               |                                |                |                 |      | <i>Monodora angolensis</i><br>Welw.     | Mpeya, mpeve      | <i>Annonaceae</i>     |                          |            |                |
| Sexual weakness or impotence                      | Root          | Infusion, decoction, pounded   |                |                 |      |                                         |                   |                       |                          |            |                |
| Hernia                                            | Root          | Decoction                      |                |                 |      |                                         |                   |                       |                          |            |                |
| Hernia                                            | Fruit/semence | Powder                         |                |                 |      |                                         |                   |                       |                          |            |                |
| Abdominal colic                                   | Fruit/semence | Pounded                        |                |                 |      |                                         |                   |                       |                          |            |                |
| Whitlow                                           | Fruit/semence | Pounded                        |                |                 |      |                                         |                   |                       |                          |            |                |
| Hemorrhoids                                       | Fruit/semence | Decoction, maceration, pounded |                |                 |      |                                         |                   |                       |                          |            |                |
| <i>Morinda lucida</i> Benth.                      | N'siki        | <i>Rubiaceae</i>               | a, b, c        | 0.05            | 0.00 | Erectil malfunction                     | Fruit/semence     | Decoction             | Oral intake              | Tree       | Forest recruit |
|                                                   |               |                                |                |                 |      | Dermatosis                              | Fruit/semence     | Powder                |                          |            |                |
|                                                   |               |                                |                |                 |      | Intestinal parasitosis                  | Leaf              |                       |                          |            |                |
|                                                   |               |                                |                |                 |      | Tooth decay                             | Leaf, Root        |                       |                          |            |                |
|                                                   |               |                                |                |                 |      | Hookworm                                | Leaf              |                       |                          |            |                |
|                                                   |               |                                |                |                 |      | Microfilariae                           | Leaf              |                       |                          |            |                |
|                                                   |               |                                |                |                 |      | Epilepsy                                | Leaf              | Decoction             |                          |            |                |
|                                                   |               |                                |                |                 |      | Hernia                                  | Root              |                       |                          |            |                |
|                                                   |               |                                |                |                 |      | Mastitis                                | Leaf              |                       |                          |            |                |
|                                                   |               |                                |                |                 |      | Measles                                 | Leaf              |                       |                          |            |                |
| <i>Morinda morindoides</i><br>(Baker) Milne-Redh. | Kongo bololo  | <i>Rubiaceae</i>               | a, b, c        | 0.04            | 0.00 | Hemorrhoids                             | Root              |                       | Oral intake              | Liana      | Forest gallery |
|                                                   |               |                                |                |                 |      | Intestinal parasitosis                  | Leaf              | Decoction             |                          |            |                |
|                                                   |               |                                |                |                 |      | Abdominal colic                         | Fruit/semence     | Decoction             |                          |            |                |
|                                                   |               |                                |                |                 |      | Smallpox                                | Leaf              | Decoction             |                          |            |                |
|                                                   |               |                                |                |                 |      | Gonorrhoea                              | Leaf              | Pounded               |                          |            |                |
|                                                   |               |                                |                |                 |      | Diabetes                                | Leaf              | Decoction             |                          |            |                |
|                                                   |               |                                |                |                 |      | Joint pain                              | Leaf              | Decoction             |                          |            |                |
|                                                   |               |                                |                |                 |      | Hemorrhoids                             | Leaf              | Decoction             |                          |            |                |
|                                                   |               |                                |                |                 |      |                                         |                   |                       |                          |            |                |
|                                                   |               |                                |                |                 |      | Malaria                                 | Leaf              | Decoction             |                          |            |                |

Synoptic table of medicinal plants and their use in Kisantu and Mbanza-Ngungu terroirs  
(in which a “Kisantu”, B “Mbanza-Ngungu urban area and, c “Mbanza-Ngungu rural area”).

| Species                                             | Local name              | Botanic family      | Recording area | UV <sub>s</sub> | IAR  | Disease                                                   | Organ               | Method of preparation | Method of administration | Morphology | Harvested area     |
|-----------------------------------------------------|-------------------------|---------------------|----------------|-----------------|------|-----------------------------------------------------------|---------------------|-----------------------|--------------------------|------------|--------------------|
| <i>Moringa oleifera</i> Lam.                        | Muringa                 | <i>Moringaceae</i>  | a              | 0.01            | 0.00 | Conjunctivitis and cataract                               | Flower              | Trituration           | Instillation             | Tree       | Field, home garden |
|                                                     |                         |                     |                |                 |      | Diabetes                                                  | Leaf                | Powder                | Oral intake              |            |                    |
| (Undetermined)                                      | Mpeya mpeya             |                     | a              | 0.01            | 0.00 | Sexual weakness or impotence                              | Root                | Pounded               | Application on the organ | Shrub      | Savanna            |
| <i>Mucuna pruriens</i> (L.) DC.                     | Mankundia               | <i>Fabaceae</i>     | a, c           | 0.02            | 0.33 | Epilepsy                                                  | Leaf                | Powder                | Oral intake              | Liana      | Forest fallow      |
|                                                     |                         |                     |                |                 |      | Asthma                                                    | Leaf                | Powder                | Oral intake              |            |                    |
|                                                     |                         |                     |                |                 |      | Tuberculosis                                              | Leaf                | Maceration            | Oral intake              |            |                    |
| <i>Musa × paradisiaca</i> L.                        | Dinkondo di matiba      | <i>Musaceae</i>     | a, c           | 0.02            | 0.33 | Rheumatism                                                | Bark, Fruit/semence | Powder                | Scarification            | Shrub      | Field, home garden |
|                                                     |                         |                     |                |                 |      | Female infertility                                        | Root                | Decoction             | Oral intake              |            |                    |
|                                                     |                         |                     |                |                 |      | Hemorrhoids                                               | Fruit/semence       | Pounded               | Oral intake              |            |                    |
| <i>Musanga cecropioides</i> R.Br. ex Tedlie         | N'senga                 | <i>Urticaceae</i>   | a, c           | 0.01            | 1.00 | Laryngitis                                                | Bark                | Decoction             | Oral intake              | Tree       | Forest recruit     |
| <i>Myrianthus arboreus</i> P.Beauv.                 | Mantusu, Mbuba          | <i>Urticaceae</i>   | c              | 0.01            | 0.00 | Tuberculosis                                              | Leaf                | Maceration            | Oral intake              | Tree       | Forest recruit     |
|                                                     |                         |                     |                |                 |      | Elephantiasis and yellowing of the hair                   | Root                | Decoction             | Oral intake              | Shrub      | Ruderal            |
| <i>Newbouldia laevis</i> (P.Beauv.) Seem. ex Bureau | Mumpesi mpesi (di gâta) | <i>Bignoniaceae</i> | a, c           | 0.03            | 0.33 | Hemorrhoids                                               | Bark, root          | Decoction, pounded    | Oral intake              |            |                    |
|                                                     |                         |                     |                |                 |      | Sexual weakness or impotence                              | Bark, root          | Decoction, pounded    | Oral intake              |            |                    |
|                                                     |                         |                     |                |                 |      | Tuberculosis                                              | Bark                | Decoction             | Oral intake              |            |                    |
|                                                     |                         |                     |                |                 |      | Whitlow                                                   | Leaf                | Pounded               | External application     | Shrub      | Field, home garden |
| <i>Nicotiana tabacum</i> L.                         | Fumu                    | <i>Solananceae</i>  | a, c           | 0.01            | 0.50 | Hemorrhoids                                               | Leaf                | Infusion, maceration  | Oral intake              |            |                    |
|                                                     |                         |                     |                |                 |      | Tooth decay                                               |                     | Paste                 | Application on the organ |            |                    |
| (Undetermined)                                      | Nkelo                   |                     | a              | 0.01            | 0.00 | Prostate                                                  | Leaf                | Maceration            | Oral intake              | Herb       | Savanna            |
|                                                     |                         |                     |                |                 |      | Chronic scabies with itching and stink                    | Whole plant         | Powder                | External application     | Herb       | Swamp              |
| <i>Nymphaea lotus</i> L.                            | Longa longa             | <i>Nymphaeaceae</i> | a, b, c        | 0.04            | 0.13 | Acute nervousness                                         | Whole plant         | Pounded               | Oral intake              |            |                    |
|                                                     |                         |                     |                |                 |      | Itchy skin rash                                           | Whole plant         | Maceration, pounded   | Oral intake              |            |                    |
|                                                     |                         |                     |                |                 |      | Epilepsy                                                  | Whole plant         | Maceration            | Instillation             |            |                    |
|                                                     |                         |                     |                |                 |      | Alcoholism and smoking                                    | Whole plant         | Powder                | Oral intake              |            |                    |
|                                                     |                         |                     |                |                 |      | Migraine                                                  | Leaf                | Maceration            | Enema                    |            |                    |
|                                                     |                         |                     |                |                 |      | Edema                                                     | Leaf                | Maceration            | Oral intake              |            |                    |
|                                                     |                         |                     |                |                 |      | Edema and yellowing of the hair                           | Leaf                | Decoction             | Oral intake              |            |                    |
| <i>Ochna afzelii</i> R.Br. ex Oliv.                 | Kidiimbi, Ngonti        | <i>Ochnaceae</i>    | a              | 0.01            | 0.00 | Anemia                                                    | Bark                | Decoction             | Oral intake              | Shrub      | Savanna            |
|                                                     |                         |                     |                |                 |      | Sudden dizziness with headache and blurred vision (Zieta) |                     | Pounded               | Oral intake              | Herb       | Field, home garden |
| <i>Ocimum basilicum</i> L.                          | Mazulu                  | <i>Lamiaceae</i>    | a, b, c        | 0.04            | 0.00 | Amoebiasis                                                |                     | Pounded               | Anal route               |            |                    |
|                                                     |                         |                     |                |                 |      | Migraine                                                  |                     | Trituration           | Friction                 |            |                    |
|                                                     |                         |                     |                |                 |      | Hemorrhoids                                               | Leaf                | Decoction             | Anal route               |            |                    |
|                                                     |                         |                     |                |                 |      | Hookworm                                                  |                     | Decoction             | Oral intake              |            |                    |
|                                                     |                         |                     |                |                 |      | Gastritis                                                 |                     | Decoction, maceration | Oral intake              |            |                    |
|                                                     |                         |                     |                |                 |      | Malnutrition and kwashiorkor                              |                     | Decoction             | Oral intake              |            |                    |

Synoptic table of medicinal plants and their use in Kisantu and Mbanza-Ngungu terroirs  
(in which a “Kisantu”, B “Mbanza-Ngungu urban area and, c “Mbanza-Ngungu rural area”).

| Species                                              | Local name            | Botanic family            | Recording area | UV <sub>s</sub> | IAR  | Disease                       | Organ             | Method of preparation         | Method of administration | Morphology | Harvested area     |
|------------------------------------------------------|-----------------------|---------------------------|----------------|-----------------|------|-------------------------------|-------------------|-------------------------------|--------------------------|------------|--------------------|
| <i>Ocimum gratissimum</i> L.                         | Dinsusu-nsusu di neni | <i>Lamiaceae</i>          | a, b, c        | 0.08            | 0.26 | Headache                      | Leaf              | Crushed, trituration, pounded | Friction, instillation   | Herb       | Field, home garden |
|                                                      |                       |                           |                |                 |      | Cold                          | Leaf              | Maceration                    | Oral intake              |            |                    |
|                                                      |                       |                           |                |                 |      | Tooth decay                   | Leaf              | Decoction                     | Oral intake              |            |                    |
|                                                      |                       |                           |                |                 |      | Asthma                        | Leaf              | Pounded                       | Oral intake              |            |                    |
|                                                      |                       |                           |                |                 |      | Cough                         | Whole plant       | Pounded                       | Oral intake              |            |                    |
|                                                      |                       |                           |                |                 |      | Pneumonia                     | Leaf              | Pounded                       | Friction                 |            |                    |
|                                                      |                       |                           |                |                 |      | Sciatic neuralgia             | Leaf              | Pounded                       | Friction                 |            |                    |
|                                                      |                       |                           |                |                 |      | Slight fracture               | Leaf              | Trituration                   | External application     |            |                    |
|                                                      |                       |                           |                |                 |      | Sciatic neuralgia             | Leaf              | Decoction                     | Oral intake              |            |                    |
|                                                      |                       |                           |                |                 |      | Hemorrhoids                   | Leaf              | Decoction                     | Anal route               |            |                    |
|                                                      |                       |                           |                |                 |      | Migraine                      | Leaf              | Trituration                   | Instillation             |            |                    |
|                                                      |                       |                           |                |                 |      | Mastitis                      | Leaf              | Crushed                       | Friction                 |            |                    |
|                                                      |                       |                           |                |                 |      | Diabetes                      | Leaf              | Decoction                     | Oral intake              |            |                    |
|                                                      |                       |                           |                |                 |      | Back pain                     | Leaf              | Pounded                       | Anal route               |            |                    |
|                                                      |                       |                           |                |                 |      | Rheumatism                    | Leaf              | Decoction, ointment           | Friction, massage        |            |                    |
| <i>Ocimum minimum</i> L.                             | Dinsusu di fioti      | <i>Lamiaceae</i>          | a              | 0.01            | 0.50 | Otitis                        | Leaf              | Trituration                   | Instillation             | Herb       | Field, home garden |
|                                                      |                       |                           |                |                 |      | Migraine                      |                   | Pounded                       |                          |            |                    |
| <i>Oncoba spinosa</i> Forssk.                        | Nsansi                | <i>Flacourtiaceae</i>     | a              | 0.01            | 0.00 | Cough                         | Leaf              | Crushed                       | Friction                 | Shrub      | Forest gallery     |
|                                                      |                       |                           |                |                 |      | Syphilis                      | Leaf              | Maceration                    | Oral intake              |            |                    |
| <i>Ottelia ulvifolia</i> (Planch.) Walp.             | Làadi                 | <i>Hydrocharita-ceae</i>  | a, b, c        | 0.02            | 0.00 | Rheumatism                    | Leaf              | Decoction                     | Oral intake              | Herb       | Swamp              |
|                                                      |                       |                           |                |                 |      | Acute nervousness             | Leaf, root        | Pounded                       | Oral intake              |            |                    |
|                                                      |                       |                           |                |                 |      | Headache                      | Leaf              | Powder                        | Friction                 |            |                    |
|                                                      |                       |                           |                |                 |      | Epilepsy                      | Leaf              | Maceration                    | Instillation             |            |                    |
| <i>Parinari capensis</i> Harv.                       | Nsudi funi            | <i>Chrysobalana-ceae</i>  | b              | 0.01            | 0.00 | Diabetes                      | Leaf              | Decoction                     | Oral intake              | Herb       | Savanna            |
| <i>Paullinia pinnata</i> L.                          | Ngudi nkayi           | <i>Sapindaceae</i>        | b              | 0.01            | 0.00 | Malaria                       |                   |                               |                          |            |                    |
| <i>Pentaclethra eetveldeana</i> De Wild. & T. Durand | Kiseka                | <i>Fabaceae</i>           | a              | 0.01            | 0.00 | Pneumonia                     | Leaf              | Trituration                   | Friction                 | Liana      | Forest recruit     |
| <i>Pentaclethra macrophylla</i> Benth.               | N'gansi               | <i>Fabaceae</i>           | a              | 0.01            | 0.00 | Microfilariate                | Leaf              | Pounded                       | External application     | Tree       | Forest recruit     |
| <i>Pentadiplandra brazzeana</i> Baill.               | Nkengi kiasa          | <i>Pentadiplandraceae</i> | a, b, c        | 0.06            | 0.23 | Hernia                        | Whole plant, Root | Decoction, maceration, powder | Oral intake              | Shrub      | Forest gallery     |
|                                                      |                       |                           |                |                 |      | Sexual weakness or impotence  | Root              | Pounded                       | Oral intake              |            |                    |
|                                                      |                       |                           |                |                 |      | Hemorrhoids                   | Root              | Maceration                    | Oral intake              |            |                    |
|                                                      |                       |                           |                |                 |      | Laryngitis                    | Root              | Decoction                     | Oral intake              |            |                    |
|                                                      |                       |                           |                |                 |      | Rheumatism                    | Leaf              | Decoction                     | Friction                 |            |                    |
|                                                      |                       |                           |                |                 |      | Parkinson                     | Leaf              | Decoction                     | Oral intake              |            |                    |
|                                                      |                       |                           |                |                 |      | Sciatic neuralgia             | Root              | Decoction                     | Friction                 |            |                    |
|                                                      |                       |                           |                |                 |      | Gonorrhea                     | Root              | Decoction                     | Oral intake              |            |                    |
|                                                      |                       |                           |                |                 |      | Gastritis                     | Leaf              | Decoction                     | Oral intake              |            |                    |
|                                                      |                       |                           |                |                 |      | Dermatosis                    | Root              | Powder                        | Oral intake              |            |                    |
|                                                      |                       |                           |                |                 |      | Mastitis                      | Root              | Pounded                       | Friction                 |            |                    |
|                                                      |                       |                           |                |                 |      | <i>Persea americana</i> Mill. | Divoka            | <i>Lauraceae</i>              | a, b                     |            |                    |
|                                                      |                       |                           |                |                 |      | Tension                       | Fruit/semence     | Decoction                     | Oral intake              |            |                    |

Synoptic table of medicinal plants and their use in Kisantu and Mbanza-Ngungu terroirs  
(in which a “Kisantu”, B “Mbanza-Ngungu urban area and, c “Mbanza-Ngungu rural area”).

| Species                                          | Local name    | Botanic family        | Recording area | UV <sub>s</sub> | IAR  | Disease                                            | Organ         | Method of preparation          | Method of administration | Morphology | Harvested area     |
|--------------------------------------------------|---------------|-----------------------|----------------|-----------------|------|----------------------------------------------------|---------------|--------------------------------|--------------------------|------------|--------------------|
| <i>Phaseolus vulgaris</i> L.                     | Madesu        | <i>Fabaceae</i>       | c              | 0.01            | 0.00 | Diabetes                                           | Fruit/semence | Infusion                       | Oral intake              | Liana      | Field, home garden |
| <i>Phyllanthus niruri</i> L.                     | Ntéteta nteta | <i>Phyllanthaceae</i> | a, b           | 0.01            | 0.00 | Migraine<br>Amoebiasis                             | Leaf          | Pounded<br>Decoction           | Friction<br>Oral intake  | Shrub      | Ruderal            |
| <i>Physalis angulata</i> L.                      | Bobo          | <i>Solanaceae</i>     | b              | 0.01            | 0.00 | Gastritis                                          | Leaf          | Pounded                        | External application     | Herb       | Ruderal            |
| <i>Piper nigrum</i> L.                           | Kupidi        | <i>Piperaceae</i>     | a, b, c        | 0.03            | 0.43 | Hernia                                             | Fruit/semence | Powder                         | Oral intake              | Liana      | Humid forest       |
|                                                  |               |                       |                |                 |      | Hemorrhoids                                        | Fruit/semence | Decoction, maceration, pounded | Oral intake              |            |                    |
|                                                  |               |                       |                |                 |      | Hookworm                                           | Fruit/semence | Powder                         | Oral intake              |            |                    |
|                                                  |               |                       |                |                 |      | Back pain                                          | Leaf          | Pounded                        | Friction                 |            |                    |
| <i>Piper umbellatum</i> L.                       | Lumba-lumba   | <i>Piperaceae</i>     | a, b           | 0.02            | 0.00 | Lack of uvula causing the baby to cry continuously | Leaf          | Maceration                     | Oral intake              | Herb       | Forest gallery     |
|                                                  |               |                       |                |                 |      | Laryngitis                                         | Leaf          | Maceration                     |                          |            |                    |
|                                                  |               |                       |                |                 |      | Alcoholism and smoking                             | Leaf          | Powder                         |                          |            |                    |
| <i>Plumeria alba</i> L.                          | Frangipanier  | <i>Apocynaceae</i>    | a              | 0.01            | 0.00 | Hiccup                                             | Latex/sap     | Raw state                      | Instillation             | Shrub      | Field, home garden |
| <i>Polygala acicularis</i> Oliv.                 | Lusambi sambi | <i>Polygalaceae</i>   | a, b, c        | 0.02            | 0.00 | Diabetes                                           | Bark          | Decoction                      | Oral intake              | Herb       | Savanna            |
|                                                  |               |                       |                |                 |      | Hemorrhoids                                        | Leaf          | Decoction                      | Anal route               |            |                    |
| <i>Portulaca oleracea</i> L.                     | Madia ngulu   | <i>Portulacaceae</i>  | b              | 0.01            | 0.00 | Madness                                            | Whole plant   | Pounded                        | Oral intake              | Herb       | Ruderal            |
|                                                  |               |                       |                |                 |      | Nephritis                                          | Whole plant   | Decoction                      | Oral intake              |            |                    |
| <i>Pseudospondias microcarpa</i> (A.Rich.) Engl. | N'yibu        | <i>Anacardiaceae</i>  | a, c           | 0.02            | 0.00 | Enuresis                                           | Bark          | Decoction                      | Oral intake              | Tree       | Forest gallery     |
|                                                  |               |                       |                |                 |      | Sexual weakness or impotence                       |               | Pounded                        |                          |            |                    |
|                                                  |               |                       |                |                 |      | Female infertility                                 |               | Decoction                      |                          |            |                    |
|                                                  |               |                       |                |                 |      | Hookworm                                           |               | Powder                         |                          |            |                    |
| <i>Psidium cattleianum</i> Afzel. Ex Sabine      | Mfulunta      | <i>Myrtaceae</i>      | a              | 0.01            | 0.00 | Abdominal colic                                    | Leaf          | Pounded                        | Friction                 | Shrub      | Savanna            |
|                                                  |               |                       |                |                 |      | Amoebiasis                                         |               |                                | Oral intake              |            |                    |
| <i>Psidium guajava</i> L.                        | Dipela        | <i>Myrtaceae</i>      | a              | 0.01            | 0.00 | Hemorrhoids                                        | Leaf          | Maceration                     | Oral intake              | Shrub      | Field, home garden |
| <i>Psophocarpus scandens</i> (Endl.) Verdc.      | Kikalakasa    | <i>Fabaceae</i>       | b              | 0.01            | 0.00 | Malnutrition and kwashiorkor                       | Leaf          | Decoction                      | Oral intake              | Liana      | Forest fallow      |
| <i>Psorospermum febrifugum</i> Spach             |               | <i>Plantaginaceae</i> | b              | 0.01            | 0.00 | Yellow fever                                       | Bark          | Decoction                      | Oral intake              | Shrub      | Savanna            |
| <i>Pteridium aquilinum</i> (L.) Kuhn             | Misili        | <i>Pteridaceae</i>    | b              | 0.01            | 0.00 | Gastritis                                          | Root          | Maceration                     | Oral intake              | Herb       | Savanna            |
| <i>Pterocarpus angolensis</i> DC.                | Sokosoko      | <i>Fabaceae</i>       | a, c           | 0.01            | 0.00 | Diabetes                                           | Bark          | Decoction                      | Oral intake              | Shrub      | Savanna            |
|                                                  |               |                       |                |                 |      | Mastitis                                           |               | Pounded                        |                          |            |                    |
| <i>Quassia africana</i> (Baill.) Baill.          | Munkadi nkadi | <i>Simarubaceae</i>   | b              | 0.01            | 0.00 | Diabetes                                           | Root          | Maceration                     | Oral intake              | Shrub      | Forest gallery     |
|                                                  |               |                       |                |                 |      | Malaria                                            | Leaf          | Decoction                      |                          |            |                    |
| <i>Raphia textilis</i> Welw.                     | Mawusu        | <i>Arecaceae</i>      | c              | 0.01            | 0.00 | Zoster                                             | Flower        | Powder                         | External application     | Tree       | Humid forest       |
| <i>Rauvolfia vomitoria</i> Wennberg              | Kilungu       | <i>Apocynaceae</i>    | a, c           | 0.02            | 0.00 | Hernia                                             | Root          | Decoction                      | Oral intake              | Shrub      | Forest fallow      |
|                                                  |               |                       |                |                 |      | Mastitis                                           |               |                                |                          |            |                    |
|                                                  |               |                       |                |                 |      | Microfilariate                                     |               |                                |                          |            |                    |
| <i>Renealmia africana</i> Benth.                 | Susa          | <i>Zingiberaceae</i>  | c              | 0.01            | 0.00 | Epistaxis with sometimes sudden death              | Leaf          | Decoction                      | Oral intake              | Herb       | Humid forest       |



Synoptic table of medicinal plants and their use in Kisantu and Mbanza-Ngungu terroirs  
(in which a “Kisantu”, B “Mbanza-Ngungu urban area and, c “Mbanza-Ngungu rural area”).

| Species                                         | Local name               | Botanic family        | Recording area | UV <sub>s</sub> | IAR  | Disease                                             | Organ         | Method of preparation | Method of administration | Morphology | Harvested area     |
|-------------------------------------------------|--------------------------|-----------------------|----------------|-----------------|------|-----------------------------------------------------|---------------|-----------------------|--------------------------|------------|--------------------|
| <i>Rhipsalis baccifera</i> (J.S.Muell.) Stearn  | Kisadi                   | <i>Cactaceae</i>      | b              | 0.01            | 0.00 | Nephritis                                           | Thorn         | Pounded               | Oral intake              | Shrub      | Ruderal            |
|                                                 |                          |                       |                |                 |      | Gastritis                                           |               | Decoction             |                          |            |                    |
| <i>Saccharum officinarum</i> L.                 | Mukuku                   | <i>Poaceae</i>        | a, b           | 0.02            | 0.00 | Hemorrhoids                                         | Stem          | Decoction             | Oral intake              | Herb       | Field, home garden |
|                                                 |                          |                       |                |                 |      | Female infertility                                  | Stem          | Wine                  |                          |            |                    |
|                                                 |                          |                       |                |                 |      | Tension                                             | Leaf          | Decoction             |                          |            |                    |
|                                                 |                          |                       |                |                 |      | Gastritis                                           | Stem          | Wine                  |                          |            |                    |
| <i>Salacia pynaertii</i> De Wild.               | Mbondi                   | <i>Celastraceae</i>   | b              | 0.01            | 0.00 | Diabetes                                            | Leaf          | Raw state             | Oral intake              | Liana      | Forest recruit     |
| <i>Sansevieria bracteata</i> Baker              | Kula nioka               | <i>Asparagaceae</i>   | a, c           | 0.01            | 0.00 | Migraine                                            | Leaf          | Pounded               | Friction                 | Herb       | Savanna            |
|                                                 |                          |                       |                |                 |      | Stomach aches                                       | Root          | Infusion              | Oral intake              |            |                    |
| <i>Sarcocephalus latifolius</i> (Sm.) E.A.Bruce | Kilolo (Kienga) ki nseke | <i>Rubiaceae</i>      | a, b           | 0.03            | 0.17 | Hernia                                              | Root          | Decoction             | Oral intake              | Shrub      | Savanna            |
|                                                 |                          |                       |                |                 |      | Prostate                                            |               |                       |                          |            |                    |
|                                                 |                          |                       |                |                 |      | Back pain                                           |               |                       |                          |            |                    |
|                                                 |                          |                       |                |                 |      | Female infertility                                  |               |                       |                          |            |                    |
|                                                 |                          |                       |                |                 |      | Mastitis                                            |               |                       |                          |            |                    |
| <i>Sarcocephalus pobeginii</i> Hua ex Pobég.    | Kilolo (Kienga) ki masa  | <i>Rubiaceae</i>      | a, b, c        | 0.03            | 0.29 | Sexual weakness or impotence                        | Root          | Decoction             | Oral intake              | Tree       | Swamp forest       |
|                                                 |                          |                       |                |                 |      | Elephantiasis and yellowing of the hair             |               |                       |                          |            |                    |
|                                                 |                          |                       |                |                 |      | Microfilariae                                       |               |                       |                          |            |                    |
|                                                 |                          |                       |                |                 |      | Laryngitis                                          |               |                       |                          |            |                    |
|                                                 |                          |                       |                |                 |      | Nephritis                                           |               |                       |                          |            |                    |
| <i>Schwenckia americana</i> L.                  | Tumpu di nkombo          | <i>Solanaceae</i>     | a, b, c        | 0.04            | 0.00 | Testicular disappearance                            | Leaf          | Decoction             | Oral intake              | Herb       | Ruderal            |
|                                                 |                          |                       |                |                 |      | Hernia                                              |               |                       |                          |            |                    |
|                                                 |                          |                       |                |                 |      | Rheumatism                                          |               |                       |                          |            |                    |
|                                                 |                          |                       |                |                 |      | Sciatic neuralgia                                   |               |                       |                          |            |                    |
|                                                 |                          |                       |                |                 |      | Headache                                            |               |                       |                          |            |                    |
|                                                 |                          |                       |                |                 |      | Testicular disappearance                            |               |                       |                          |            |                    |
|                                                 |                          |                       |                |                 |      | Gastritis                                           |               |                       |                          |            |                    |
| Epilepsy                                        |                          |                       |                |                 |      |                                                     |               |                       |                          |            |                    |
| <i>Scleria achenii</i> De Wild.                 | Wedi wedi, welekese      | <i>Cyperaceae</i>     | a              | 0.01            | 0.00 | Hernia                                              | Root          | Decoction             | Oral intake              | Herb       | Swamp              |
|                                                 |                          |                       |                |                 |      | <i>Sclerocroton cornutus</i> (Pax) Kruijt & Roebers | Kititi        | <i>Euphorbiaceae</i>  | a, b                     | 0.02       | 0.00               |
| Female infertility                              | Bark                     | Decoction             |                |                 |      |                                                     |               |                       |                          |            |                    |
| Madness                                         | Leaf                     | Decoction             |                |                 |      |                                                     |               |                       |                          |            |                    |
| <i>Sclerosperma mannii</i> H.Wendl.             | Mabondo                  | <i>Araceae</i>        | b              | 0.01            | 0.00 | Migraine                                            | Fruit/semence | Pounded               | Enema                    | Tree       | Humid forest       |
| <i>Scoparia dulcis</i> L.                       | Kiese kiese              | <i>Plantaginaceae</i> | a              | 0.01            | 0.00 | Premature ejaculation                               | Root          | Raw state             | Oral intake              | Herb       | Ruderal            |
|                                                 |                          |                       |                |                 |      | Polio                                               | Leaf          | Powder                | Scarification            |            |                    |
| <i>Scorodophloeus zenkeri</i> Harms             | Kiwaya                   | <i>Fabaceae</i>       | b, c           | 0.01            | 0.00 | Hemorrhoids                                         | Bark          | Maceration            | Anal route               | Tree       | Forest gallery     |
|                                                 |                          |                       |                |                 |      | Hookworm                                            | Root          | Powder                | Oral intake              |            |                    |
|                                                 |                          |                       |                |                 |      | Hernia                                              | Root          | Powder                | Oral intake              |            |                    |
|                                                 |                          |                       |                |                 |      | Hemorrhoids                                         | Root          | Decoction             | Oral intake              |            |                    |
|                                                 |                          |                       |                |                 |      | Ovarian or tubal inflammation                       | Leaf          | Decoction             | Oral intake              |            |                    |
| <i>Securidaca longepedunculata</i> Fresen       | Nkama n'sunda            | <i>Polygalaceae</i>   | a, b, c        | 0.04            | 0.30 | Rheumatism                                          | Leaf, root    | Decoction, ointment   | Friction, massage        | Shrub      | Savanna            |
|                                                 |                          |                       |                |                 |      | Parkinson                                           | Root          | Decoction             | Oral intake              |            |                    |
|                                                 |                          |                       |                |                 |      | Polio                                               | Leaf, root    | Decoction             | Oral intake              |            |                    |
|                                                 |                          |                       |                |                 |      | Dermatosis                                          | Root          | Powder                | Oral intake              |            |                    |
|                                                 |                          |                       |                |                 |      | Testicular disappearance                            | Root          | Pounded               | Oral intake              |            |                    |

Synoptic table of medicinal plants and their use in Kisantu and Mbanza-Ngungu terroirs  
(in which a “Kisantu”, B “Mbanza-Ngungu urban area and, c “Mbanza-Ngungu rural area”).

| Species                                                                          | Local name                 | Botanic family       | Recording area | UV <sub>s</sub> | IAR    | Disease                                 | Organ               | Method of preparation | Method of administration   | Morphology | Harvested area     |
|----------------------------------------------------------------------------------|----------------------------|----------------------|----------------|-----------------|--------|-----------------------------------------|---------------------|-----------------------|----------------------------|------------|--------------------|
| <i>Senna alata</i> (L.) Roxb.                                                    | Bwalu,                     | <i>Fabaceae</i>      | a              | 0.01            | 0.00   | Mycosis                                 | Leaf                | Trituration           | External application       | Shrub      | Ruderal            |
| <i>Senna occidentalis</i> L.                                                     | Kanga nsundi               | <i>Fabaceae</i>      | b              | 0.01            | 0.00   | Dysmenorrhea                            | Root                | Maceration            | Oral intake                | Shrub      | Ruderal            |
| <i>Sesamum indicum</i> L.                                                        | Wangila                    | <i>Pedaliaceae</i>   | a, b           | 0.01            | 0.00   | Paralysis                               | Fruit/semence       | Oil                   | Scarification              | Herb       | Field, home garden |
|                                                                                  |                            |                      |                |                 |        | Madness                                 | Leaf                | Decoction             | Oral intake                |            |                    |
| <i>Sesamum radiatum</i> Schumach. & Thonn.                                       | Wangila matebo             | <i>Pedaliaceae</i>   | a              | 0.01            | 0.00   | Gastritis                               | Leaf                | Maceration            | Oral intake                | Herb       | Ruderal            |
| <i>Sida rhombifolia</i> L.                                                       | Lumbumvu                   | <i>Malvaceae</i>     | a, c           | 0.02            | 0.00   | Enuresis                                | Root                | Decoction             | Oral intake                | Herb       | Ruderal            |
|                                                                                  |                            |                      |                |                 |        | Childbirth pain                         | Leaf                | Maceration            |                            |            |                    |
|                                                                                  |                            |                      |                |                 |        | Amoebiasis                              | Leaf                | Raw state             |                            |            |                    |
| <i>Smilax anceps</i> Willd.                                                      | Kikalala                   | <i>Smilacaceae</i>   | a, c           | 0.01            | 0.00   | Bronchitis                              | Leaf                | Pounded               | Oral intake                | Liana      | Ruderal            |
|                                                                                  |                            |                      |                |                 |        | Microfilariae                           |                     | Decoction             |                            |            |                    |
| <i>Solanum aethiopicum</i> L.                                                    | Kinsumba                   | <i>Solanaceae</i>    | a, b           | 0.01            | 0.00   | Belly bloating ventral                  | Leaf                | Pounded               | Friction, oral intake      | Herb       | Field, home garden |
|                                                                                  |                            |                      |                |                 |        | Gastritis                               |                     | Maceration            | Oral intake                |            |                    |
| <i>Solanum lycopersicum</i> L.                                                   | Lumantu                    | <i>Solanaceae</i>    | a, c           | 0.02            | 0.33   | Migraine                                | Leaf                | Pounded               | Friction                   | Herb       | Field, home garden |
|                                                                                  |                            |                      |                |                 |        | Hemorrhoids                             | Leaf                | Pounded, decoction    | Oral intake, anal route    |            |                    |
|                                                                                  |                            |                      |                |                 |        | Headache                                | Leaf                | Decoction             | Inhalation                 |            |                    |
| <i>Solanum melongena</i> L.                                                      | Mbolongo                   | <i>Solanaceae</i>    | b              | 0.01            | 0.00   | Bronchitis                              | Leaf                | Trituration           | Oral intake                | Herb       | Field, home garden |
| <i>Solanum macrocarpon</i> L.                                                    | Nkeka                      | <i>Solanaceae</i>    | a              | 0.01            | 0.00   | Belly bloating ventral                  | Leaf                | Pounded               | Friction, oral intake      | Shrub      | Field, home garden |
| <i>Solanum</i> sp                                                                | Binsukula                  | <i>Solanaceae</i>    | a              | 0.01            | 0.00   | Bronchitis                              | Leaf                | Pounded               | Oral intake                | Shrub      | Field, home garden |
| <i>Spondias cytherea</i> Sonn.                                                   | Manga nsendi               | <i>Anacardiaceae</i> | a              | 0.01            | 0.00   | Tooth decay                             | Bark                | Decoction             | Gargle                     | Tree       | Field, home garden |
| <i>Spondias mombin</i> L.                                                        | Mungyengi                  | <i>Anacardiaceae</i> | b              | 0.01            | 0.00   | Mastitis                                | Leaf                | Raw state             | Oral intake                | Tree       | Field, home garden |
| <i>Steganotaenia araliacea</i> Hochst.                                           | Kula mvumbi, mvumbi mvumbi | <i>Apiaceae</i>      | a, b           | 0.01            | 1.00   | Hernia                                  | Root                | Decoction             | Oral intake                | Shrub      | Savanna            |
| <i>Strychnos cocculoides</i> Baker                                               | Kalakonki                  | <i>Loganiaceae</i>   | a, c           | 0.01            | 0.00   | Epilepsy                                | Leaf, root          | Powder                | Oral intake                | Shrub      | Savanna            |
|                                                                                  |                            |                      |                |                 |        | Hernia                                  | Root                | Decoction             |                            |            |                    |
| <i>Strychnos pungens</i>                                                         | Mabumi                     | <i>Loganiaceae</i>   | b              | 0.01            | 1.00   | Elephantiasis and yellowing of the hair | Fruit/semence, leaf | Decoction, pounded    | Oral intake, Scarification | Shrub      | Savanna            |
| <i>Synedrella nodiflora</i> Gaertn.                                              | Madia manlumba             | <i>Asteraceae</i>    | b              | 0.01            | 0.00   | Gastritis                               | Leaf                | Decoction             | Oral intake                | Herb       | Ruderal            |
| <i>Syzygium guineense</i> (Willd.) DC. Subsp. <i>Macrocarpum</i> (Engl.) F.White | Nkizu                      | <i>Myrtaceae</i>     | b              | 0.01            | 0.00   | Urinary and vaginal infection           | Bark                | Decoction             | Oral intake                | Shrub      | Savanna            |
|                                                                                  |                            |                      |                |                 | Anemia |                                         |                     |                       |                            |            |                    |
| <i>Tapinanthus poggei</i> (Engl.) Danser                                         | Kinkunda nkunda            | <i>Loranthaceae</i>  | a, b           | 0.01            | 0.00   | Joint pain                              | Leaf                | Decoction             | Oral intake                | Shrub      | Forest recruit     |
|                                                                                  |                            |                      |                |                 |        | Alcoholism and smoking                  |                     | Powder                |                            |            |                    |
| <i>Tephrosia vogelii</i> Hook. F.                                                | Bwalu mbaka                | <i>Fabaceae</i>      | b              | 0.01            | 0.00   | Mycosis                                 | Leaf                | Maceration            | External application       | Shrub      | Ruderal            |
|                                                                                  |                            |                      |                |                 |        | Itchy skin rash                         |                     | Pounded               |                            |            |                    |

Synoptic table of medicinal plants and their use in Kisantu and Mbanza-Ngungu terroirs  
(in which a “Kisantu”, B “Mbanza-Ngungu urban area and, c “Mbanza-Ngungu rural area”).

| Species                                                    | Local name        | Botanic family | Recording area | UV <sub>s</sub> | IAR  | Disease                                                                                                                      | Organ                                                                                      | Method of preparation                                                                                                               | Method of administration                                             | Morphology | Harvested area     |
|------------------------------------------------------------|-------------------|----------------|----------------|-----------------|------|------------------------------------------------------------------------------------------------------------------------------|--------------------------------------------------------------------------------------------|-------------------------------------------------------------------------------------------------------------------------------------|----------------------------------------------------------------------|------------|--------------------|
| <i>Tetracera alnifolia</i> Willd.                          | Nzyanzi           | Dileniaceae    | a              | 0.01            | 0.00 | Hernia                                                                                                                       | Leaf                                                                                       | Decoction                                                                                                                           | Oral intake                                                          | Liana      | Swamp forest       |
| <i>Tetradenia riparia</i> (Hochst.) Codd                   | Mutuzo            | Lamiaceae      | a              | 0.01            | 0.00 | Influenza                                                                                                                    | Leaf                                                                                       | Trituration                                                                                                                         | Instillation                                                         | Shrub      | Ruderal            |
| <i>Tetrorchidium didymostemon</i> (Baill.) Pax & K. Hoffm. | Nsusa             | Euphorbiaceae  | a, c           | 0.02            | 0.00 | Back pain<br>Hookworm<br>Edema and yellowing of the hair                                                                     | Root<br>Leaf<br>Leaf                                                                       | Decoction<br>Powder<br>Decoction                                                                                                    | Oral intake                                                          | Tree       | Forest gallery     |
| <i>Tithonia diversifolia</i> (Hemsl.) A. Gray              | Nkadi nkadi       | Asteraceae     | a              | 0.01            | 0.00 | Malaria                                                                                                                      | Leaf                                                                                       | Decoction                                                                                                                           | Oral intake                                                          | Shrub      | Ruderal            |
| <i>Trema orientalis</i> (L.) Blume                         | Mundia nuni       | Cannabaceae    | b              | 0.01            | 0.00 | Gastritis                                                                                                                    | Leaf                                                                                       | Decoction                                                                                                                           | Oral intake                                                          | Shrub      | Forest recruit     |
| <i>Trilepisium madagascariensis</i>                        | Nsekenia          | Moraceae       | b              | 0.01            | 0.00 | Anemia                                                                                                                       | Bark                                                                                       | Decoction                                                                                                                           | Oral intake                                                          | Tree       | Forest gallery     |
| <i>Urena lobata</i> L.                                     | Mpungala          | Malvaceae      | a              | 0.01            | 0.00 | Diabetes                                                                                                                     | Bark                                                                                       | Decoction                                                                                                                           | Oral intake                                                          | Herb       | Ruderal            |
| <i>Vernonia amygdalina</i> Delile                          | Mundudi-ndudi     | Asteraceae     | a, b           | 0.01            | 0.00 | Hookworm<br>Poisoning                                                                                                        | Leaf                                                                                       | Decoction<br>Pounded                                                                                                                | Oral intake                                                          | Shrub      | Savanna            |
| <i>Vigna subterranea</i> (L.) Verdc.                       | Nguba zi nsamba   | Fabaceae       | b              | 0.01            | 0.00 | Gastritis                                                                                                                    | Fruit/semence                                                                              | Maceration                                                                                                                          | Oral intake                                                          | Herb       | Field, home garden |
| <i>Vigna unguiculata</i> (L.) Walp.                        | Madesu ma Mbuengi | Fabaceae       | a              | 0.02            | 0.00 | Chest or intercostal pain<br>Splenomegaly<br>Laryngitis<br>Vitiligo                                                          | Fruit/semence<br>Fruit/semence<br>Fruit/semence<br>Leaf                                    | Pounded<br>Pounded<br>Decoction<br>Powder                                                                                           | Scarification<br>Scarification<br>Oral intake, external application  | Herb       | Field, home garden |
| <i>Vitex doniana</i> Sweet                                 | Fiolongo          | Lamiaceae      | a              | 0.01            | 0.00 | Tension                                                                                                                      | Bark                                                                                       | Pounded                                                                                                                             | Oral intake                                                          | Tree       | Swamp forest       |
| <i>Vitex ferruginea</i> Schumach. & Thonn.                 | Ozu               | Lamiaceae      | a              | 0.01            | 0.00 | Wound<br>Hernia                                                                                                              | Bark                                                                                       | Powder<br>Infusion                                                                                                                  | Enema<br>Anal route                                                  | Shrub      | Savanna            |
| <i>Vitex madiensis</i> Oliv.                               | Kifilu            | Lamiaceae      | a, b, c        | 0.02            | 0.25 | Hemorrhoids<br>Hookworm<br>Tension<br>Cervical lymphadenopathy                                                               | Leaf, root<br>Leaf<br>Leaf<br>Root                                                         | Maceration, decoction<br>Decoction<br>Decoction<br>Infusion                                                                         | Oral intake, anal route<br>Oral intake<br>Oral intake<br>Oral intake | Shrub      | Savanna            |
| <i>Xylopia aethiopia</i> (Dunal) A. Rich.                  | Nkuya nkuya       | Annonaceae     | a, b, c        | 0.03            | 0.17 | Hernia<br>Ascites<br>Hemorrhoids<br>Sexual weakness or impotence<br>Diabetes<br>Polio<br>Headache<br>Prostate<br>Hemorrhoids | Bark, leaf<br>Bark<br>Bark<br>Fruit/semence<br>Bark<br>Bark<br>Ears<br>Beard, leaf<br>Leaf | Maceration, powder<br>Decoction<br>Decoction<br>Decoction<br>Decoction<br>Decoction<br>Powder<br>Decoction, maceration<br>Decoction | Oral intake                                                          | Tree       | Swamp forest       |
| <i>Zea mays</i> L.                                         | Masangu           | Poaceae        | a              | 0.03            | 0.00 | Laryngitis                                                                                                                   | Fruit/semence                                                                              | Decoction                                                                                                                           | Oral intake                                                          | Herb       | Field, home garden |

Synoptic table of medicinal plants and their use in Kisantu and Mbanza-Ngungu terroirs  
(in which a “Kisantu”, B “Mbanza-Ngungu urban area and, c “Mbanza-Ngungu rural area”).

| Species                                      | Local name | Botanic family       | Recording area | UV <sub>s</sub> | IAR  | Disease                      | Organ   | Method of preparation                    | Method of administration | Morphology | Harvested area     |
|----------------------------------------------|------------|----------------------|----------------|-----------------|------|------------------------------|---------|------------------------------------------|--------------------------|------------|--------------------|
| <i>Zingiber officinale</i><br><i>Roscoe.</i> | Tangawisi  | <i>Zingiberaceae</i> | a, b, c        | 0.04            | 0.53 | Hemorrhoids                  | Rhizome | Decoction, infusion, maceration, pounded | Oral intake, anal route  | Herb       | Field, home garden |
|                                              |            |                      |                |                 |      | Cough                        | Rhizome | Decoction                                | Oral intake              |            |                    |
|                                              |            |                      |                |                 |      | Sexual weakness or impotence | Rhizome | Decoction                                | Oral intake              |            |                    |
|                                              |            |                      |                |                 |      | Premature ejaculation        | Rhizome | Infusion, pounded                        | Oral intake              |            |                    |
|                                              |            |                      |                |                 |      | Gonorrhoea                   | Rhizome | Decoction, maceration                    | Oral intake              |            |                    |
|                                              |            |                      |                |                 |      | Intestinal parasitosis       | Rhizome | Decoction                                | Oral intake              |            |                    |
|                                              |            |                      |                |                 |      | Hookworm                     | Rhizome | Decoction                                | Oral intake              |            |                    |
|                                              |            |                      |                |                 |      | Rheumatism                   | Rhizome | Ointment                                 | Massage                  |            |                    |
